# Supplementary material for: Kikwit Ebola Virus Disease Progression in the Rhesus Monkey Animal Model
Source: PubMed Central journal article supplement (PMC7411891; doi:10.3390/v12070753), 2020-07-14
Supplement: viruses-12-00753-s001.pdf [file viruses-12-00753-s001.pdf]

# Kikwit Ebola Virus Disease Progression in the Rhesus Monkey Animal Model

Richard S. Bennett <sup>1,\*†</sup>, James Logue <sup>1,†</sup>, David X. Liu <sup>1</sup>, Rebecca J. Reeder <sup>1</sup>, Krisztina B. Janosko <sup>1</sup>, Donna L. Perry <sup>1</sup>, Timothy K. Cooper <sup>1</sup>, Russell Byrum <sup>1</sup>, Danny Ragland <sup>1</sup>, Marisa St. Claire <sup>1</sup>, Ricky Adams <sup>1</sup>, Tracey L. Burdette <sup>1</sup>, Tyler M. Brady <sup>1</sup>, Kyra Hadley <sup>1</sup>, M. Colin Waters <sup>1</sup>, Rebecca Shim <sup>1</sup>, William Dowling <sup>2</sup>, Jing Qin <sup>3</sup>, Ian Crozier <sup>4</sup>, Peter B. Jahrling <sup>1,5</sup> and Lisa E. Hensley <sup>1</sup>

<sup>1</sup> Integrated Research Facility, Division of Clinical Research, National Institute of Allergy and Infectious Diseases, National Institutes of Health, 8200 Research Plaza, Frederick, MD 27102, USA; James.Logue@som.umaryland.edu (J.L.); xianhong.liu@nih.gov (D.X.L.); rebecca.reeder@nih.gov (R.J.R.); krisztina.janosko@nih.gov (K.B.J.); donna.perry@nih.gov (D.L.P.); timothy.cooper@nih.gov (T.K.C.); byrumr@niaid.nih.gov (R.B.); raglandd@niaid.nih.gov (D.R.); stclairem@niaid.nih.gov (M.S.C.); ricky.adams@nih.gov (R.A.); tracey.burdette@nih.gov (T.L.B.); tyler.brady@nih.gov (T.M.B.); kyra.hadley@nih.gov (K.H.); mason.waters@nih.gov (M.C.W.); rebecca.shim@nih.gov (R.S.); jahrlingp@niaid.nih.gov (P.B.J.); lisa.hensley@nih.gov (L.E.H.)

<sup>2</sup> Research Resources Section, Office of Biodefense, Research Resources, and Translational Research/Division of Microbiology and Infectious Diseases, National Institute of Allergy and Infectious Diseases, National Institutes of Health, 5601 Fishers Lane, Rockville, MD 20892-9825, USA; william.dowling@cepi.net

<sup>3</sup> Biostatistics Research Branch, National Institute of Allergy and Infectious Diseases, National Institutes of Health, 5601 Fishers Lane, Rockville, MD 20892, USA; jingqin@niaid.nih.gov

<sup>4</sup> Clinical Monitoring Research Program Directorate, Frederick National Laboratory for Cancer Research, Frederick, MD 21702 USA; ian.crozier@nih.gov

<sup>5</sup> Emerging Viral Pathogens Section, National Institute of Allergy and Infectious Diseases, National Institutes of Health, 8200 Research Plaza, Frederick, MD 21702, USA

\* Correspondence: Richard.Bennett@nih.gov; Tel.: +1-301-631-7257

† These authors contributed equally to this work.

Received: 24 April 2020; Accepted: 6 July 2020; Published: 14 July 2020

Supplementary tables (S)

Table S1: Animal characteristics and study group assignments.

| Challenge group | Group                                         | Animal | Age <sup>a</sup> |             |        |
|-----------------|-----------------------------------------------|--------|------------------|-------------|--------|
|                 |                                               |        | (year months)    | Weight (kg) | Sex    |
| 1               | Uninfected Controls                           | NHP C1 | 7y 2m            | 7.32        | Female |
|                 |                                               | NHP C2 | 6y 0m            | 4.72        | Female |
|                 |                                               | NHP C3 | 6y 0m            | 8.08        | Male   |
|                 | Terminal Necropsy<br>(No Manipulations)       | NHP1   | 5y 7m            | 13.02       | Male   |
|                 |                                               | NHP2   | 6y 7m            | 6.58        | Female |
|                 |                                               | NHP3   | 6y 10m           | 6.60        | Female |
|                 |                                               | NHP4   | 5y 7m            | 10.02       | Male   |
|                 |                                               | NHP5   | 6y 5m            | 8.08        | Male   |
|                 |                                               | NHP6   | 6y 6m            | 5.42        | Female |
| 2               | Terminal Necropsy<br>(Routine Manipulations)  | NHP7   | 6y 10m           | 5.48        | Female |
|                 |                                               | NHP8   | 6y 0m            | 6.30        | Female |
|                 |                                               | NHP9   | 6y 6m            | 10.98       | Male   |
|                 |                                               | NHP10  | 6y 10m           | 5.82        | Female |
|                 |                                               | NHP11  | 6y 11m           | 9.32        | Male   |
|                 |                                               | NHP12  | 5y 4m            | 8.26        | Male   |
| 3               | Scheduled Necropsy<br>(3 Days Post-infection) | NHP13  | 6y 0m            | 10.14       | Male   |
|                 |                                               | NHP14  | 7y 1m            | 6.64        | Female |
|                 |                                               | NHP15  | 5y 11m           | 5.96        | Female |
|                 | Scheduled Necropsy<br>(5 Days Post-infection) | NHP16  | 7y 1m            | 5.10        | Female |
|                 |                                               | NHP17  | 7y 0m            | 7.34        | Female |
|                 |                                               | NHP18  | 6y 0m            | 8.04        | Female |
| 4               | Scheduled Necropsy<br>(4 Days Post-infection) | NHP19  | 6y 6m            | 6.10        | Female |
|                 |                                               | NHP20  | 6y 5m            | 9.46        | Male   |
|                 |                                               | NHP21  | 6y 3m            | 8.10        | Male   |
|                 | Scheduled Necropsy<br>(6 Days Post-infection) | NHP22  | 7y 0m            | 7.42        | Female |
|                 |                                               | NHP23  | 6y 11m           | 10.86       | Male   |
|                 |                                               | NHP24  | 6y 2m            | 5.32        | Female |

<sup>a</sup>Age at study day 0.

Abbreviations: kg: kilogram

**Table S2 Clinical Scoring System.** Clinical scores were assigned to each animal at least once daily. Scores from each section were added together and animals were considered to reach clinical endpoint once that clinical score sum reached at least a 10.

| Parameter                                                                                                        | Degree of Parameter                                                                                                                     | Score |
|------------------------------------------------------------------------------------------------------------------|-----------------------------------------------------------------------------------------------------------------------------------------|-------|
| <b>Overall clinical appearance; signs of hemorrhage</b>                                                          | Normal appearance, no petechial or ecchymotic hemorrhages                                                                               | 0     |
|                                                                                                                  | Facial edema, photophobia, cyanosis, prolonged coagulation profile                                                                      | 2     |
|                                                                                                                  | Severe diarrhea, vomiting, dehydration, petechiae                                                                                       | 5     |
|                                                                                                                  | Persistent epistaxis, melena, retrobulbar hemorrhage                                                                                    | 10    |
| <b>Respiratory rate, mucous membranes (MM) color, and dyspnea (difficulty breathing/ labored respirations)</b>   | Normal signs (Respiratory rate = 32 to 50 BPM; MM pink)                                                                                 | 0     |
|                                                                                                                  | Mild (Respiratory rate = 51 to 65 BPM, with slightly increased effort; MM pale pink)                                                    | 2     |
|                                                                                                                  | Moderate (Respiratory rate = 66 to 80 BPM, with obvious difficulty breathing; MM muddy pink)                                            | 7     |
|                                                                                                                  | Severe (Respiratory rate = > 80 BPM; respirations labored; MM blue)                                                                     | 10    |
| <b>Recumbency</b>                                                                                                | Normal – Not lying down when enter room                                                                                                 | 0     |
|                                                                                                                  | Lying down when entering room but gets up readily when approached                                                                       | 5     |
|                                                                                                                  | Lying down when entering room but gets up with stimulation at cage front                                                                | 8     |
|                                                                                                                  | Lies down; will not get up even with excessive stimulation at cage front                                                                | 10    |
| <b>Non-Responsiveness</b>                                                                                        | Normal – bright, alert, responsive                                                                                                      | 0     |
|                                                                                                                  | Mild, slightly depressed; slightly decreased appetite; puts head down when personnel in room; acts disinterested when personnel in room | 3     |
|                                                                                                                  | Moderately non-responsive; very disinterested in personnel; hunched or lying down; will get up when approached or prodded               | 5     |
|                                                                                                                  | Severe; completely non-responsive to noxious stimuli such as toe-pinch; will not get up despite significant prodding                    | 10    |
| <b>Core temperature of anesthetized animal (Normal in non-anesthetized macaque = 37 – 39°C = 98.6 – 102.2°F)</b> | >36.7°C (>98°F)                                                                                                                         | 0     |
|                                                                                                                  | 36.7>X>33.8°C (98-93.3°F)                                                                                                               | 3     |
|                                                                                                                  | <33.8°C (<93.2°F)                                                                                                                       | 10    |
| <b>Total clinical score</b>                                                                                      |                                                                                                                                         | *     |

Table S3 Clinical scores

| Subject Group                   | Subject ID | Study day with clinical score collection time indicated |      |   |   |   |   |   |   |   |    |   |   |    |   |    |    |    |    |    |    |   |
|---------------------------------|------------|---------------------------------------------------------|------|---|---|---|---|---|---|---|----|---|---|----|---|----|----|----|----|----|----|---|
|                                 |            | BL-1                                                    | BL-2 | 0 | 1 | 2 | 3 | 4 |   |   | 5  |   |   | 6  |   |    | 7  |    |    | 8  |    |   |
|                                 |            | E                                                       | E    | E | E | M | L | E | M | L | E  | M | L | E  | M | L  | E  | M  | L  | E  | M  | L |
| Non-infected Control            | NHP C1     | 0                                                       | 0    | 0 |   |   |   |   |   |   |    |   |   |    |   |    |    |    |    |    |    |   |
|                                 | NHP C2     | 0                                                       | 0    | 0 |   |   |   |   |   |   |    |   |   |    |   |    |    |    |    |    |    |   |
|                                 | NHP C3     | 0                                                       | 0    | 0 |   |   |   |   |   |   |    |   |   |    |   |    |    |    |    |    |    |   |
| Terminal: No Manipulations      | NHP1       | 0                                                       | 0    | 0 | 0 | 0 | 0 | 0 |   |   | 3  | 8 | 8 | 11 |   |    |    |    |    |    |    |   |
|                                 | NHP2       | 0                                                       | 0    | 0 | 0 | 0 | 0 | 0 | 0 |   | 5  | 3 | 3 | 3  | 3 | 8  | 15 |    |    |    |    |   |
|                                 | NHP3       | 0                                                       | 0    | 0 | 0 | 0 | 0 | 0 | 0 |   | 3  | 3 | 3 | 3  | 3 | 3  | 3  | 3  | 3  | 3  | 18 |   |
|                                 | NHP4       | 0                                                       | 0    | 0 | 0 | 0 | 0 | 0 | 0 |   | 3  | 3 | 3 | 3  | 3 | 3  | 3  | 10 |    |    |    |   |
|                                 | NHP5       | 0                                                       | 0    | 0 | 0 | 0 | 0 | 0 | 0 |   | 13 |   |   |    |   |    |    |    |    |    |    |   |
|                                 | NHP6       | 0                                                       | 0    | 0 | 0 | 0 | 0 | 0 | 0 |   | 3  | 3 | 3 | 3  | 3 | 3  | 3  | 3  | 3  | 3  | 15 |   |
| Terminal: Routine Manipulations | NHP7       | 0                                                       | 0    | 0 | 0 | 0 | 0 | 3 | 3 |   | 3  | 3 |   | 3  | 7 | 7  | 15 |    |    |    |    |   |
|                                 | NHP8       | 0                                                       | 0    | 0 | 0 | 0 | 0 | 3 | 3 |   | 3  | 3 |   | 5  | 9 |    |    |    |    |    |    |   |
|                                 | NHP9       | 0                                                       | 0    | 0 | 0 | 0 | 0 | 0 | 3 |   | 3  | 3 |   | 3  | 5 | 5  | 5  | 7  | 7  | 7  | 12 |   |
|                                 | NHP10      | 0                                                       | 0    | 0 | 0 | 0 | 0 | 0 | 0 |   | 3  | 3 |   | 3  | 5 | 5  | 5  | 5  | 15 |    |    |   |
|                                 | NHP11      | 0                                                       | 0    | 0 | 0 | 0 | 0 | 3 | 3 |   | 3  | 3 |   | 3  | 7 | 14 |    |    |    |    |    |   |
|                                 | NHP12      | 0                                                       | 0    | 0 | 0 | 0 | 0 | 0 | 0 |   | 3  | 3 |   | 3  | 3 | 3  | 3  | 5  | 7  | SD |    |   |
| Necropsy Day 3                  | NHP13      | 0                                                       | 0    | 0 | 0 | 0 | 0 |   |   |   |    |   |   |    |   |    |    |    |    |    |    |   |
|                                 | NHP14      | 0                                                       | 0    | 0 | 0 | 0 | 0 |   |   |   |    |   |   |    |   |    |    |    |    |    |    |   |
|                                 | NHP15      | 0                                                       | 0    | 0 | 0 | 0 | 0 |   |   |   |    |   |   |    |   |    |    |    |    |    |    |   |
| Necropsy Day 5                  | NHP16      | 0                                                       | 0    | 0 | 0 | 0 | 0 | 3 | 3 |   | 3  |   |   |    |   |    |    |    |    |    |    |   |
|                                 | NHP17      | 0                                                       | 0    | 0 | 0 | 0 | 0 | 0 | 0 |   | 0  |   |   |    |   |    |    |    |    |    |    |   |
|                                 | NHP18      | 0                                                       | 0    | 0 | 0 | 0 | 0 | 0 | 0 |   | 3  |   |   |    |   |    |    |    |    |    |    |   |
| Necropsy Day 4                  | NHP19      | 0                                                       | 0    | 0 | 0 | 0 | 0 | 3 |   |   |    |   |   |    |   |    |    |    |    |    |    |   |
|                                 | NHP20      | 0                                                       | 0    | 0 | 0 | 0 | 0 | 0 |   |   |    |   |   |    |   |    |    |    |    |    |    |   |
|                                 | NHP21      | 0                                                       | 0    | 0 | 0 | 0 | 0 | 0 |   |   |    |   |   |    |   |    |    |    |    |    |    |   |
| Necropsy Day 6                  | NHP22      | 0                                                       | 0    | 0 | 0 | 0 | 0 | 0 | 3 |   | 3  | 3 | 5 | 7  |   |    |    |    |    |    |    |   |
|                                 | NHP23      | 0                                                       | 0    | 0 | 0 | 0 | 0 | 0 | 0 |   | 3  | 3 | 3 | 3  |   |    |    |    |    |    |    |   |
|                                 | NHP24      | 0                                                       | 0    | 0 | 0 | 0 | 0 | 0 | 3 |   | 3  | 5 | 5 | 5  |   |    |    |    |    |    |    |   |

Abbreviations: E, early time check; M, midday animal check; L, late afternoon animal check; BL, Baseline. White spaces indicate times when scores were not collected.

**Table S4 Rash**

| Subject Group                   | Subject ID | BL-1 | BL-2 | 0 | 1 | 2 | 3 | 4 | 5    | 6         | 7         | 8    |
|---------------------------------|------------|------|------|---|---|---|---|---|------|-----------|-----------|------|
| Non-infected Control            | NHP C1     |      |      |   |   |   |   |   |      |           |           |      |
|                                 | NHP C2     |      |      |   |   |   |   |   |      |           |           |      |
|                                 | NHP C3     |      |      |   |   |   |   |   |      |           |           |      |
| Terminal: No Manipulations      | NHP1       |      |      |   |   |   |   |   | Face | Face      |           |      |
|                                 | NHP2       |      |      |   |   |   |   |   | Face | Face      | Face      |      |
|                                 | NHP3       |      |      |   |   |   |   |   | Face |           | Face      |      |
|                                 | NHP4       |      |      |   |   |   |   |   |      | Face      | Face/arms |      |
|                                 | NHP5       |      |      |   |   |   |   |   |      |           |           |      |
|                                 | NHP6       |      |      |   |   |   |   |   |      |           |           | Face |
| Terminal: Routine Manipulations | NHP7       |      |      |   |   |   |   |   | Face | Face      | Face      |      |
|                                 | NHP8       |      |      |   |   |   |   |   | Face | Face      |           |      |
|                                 | NHP9       |      |      |   |   |   |   |   |      | Face/Arms | Face      | Face |
|                                 | NHP10      |      |      |   |   |   |   |   |      | Face/Arms | Face      |      |
|                                 | NHP11      |      |      |   |   |   |   |   | Arms | Face/Arms |           |      |
|                                 | NHP12      |      |      |   |   |   |   |   |      |           | Face/Arms | SD   |
| Necropsy Day 3                  | NHP13      |      |      |   |   |   |   |   |      |           |           |      |
|                                 | NHP14      |      |      |   |   |   |   |   |      |           |           |      |
|                                 | NHP15      |      |      |   |   |   |   |   |      |           |           |      |
| Necropsy Day 5                  | NHP16      |      |      |   |   |   |   |   |      |           |           |      |
|                                 | NHP17      |      |      |   |   |   |   |   |      |           |           |      |
|                                 | NHP18      |      |      |   |   |   |   |   | Face |           |           |      |
| Necropsy Day 4                  | NHP19      |      |      |   |   |   |   |   |      |           |           |      |
|                                 | NHP20      |      |      |   |   |   |   |   |      |           |           |      |
|                                 | NHP21      |      |      |   |   |   |   |   |      |           |           |      |
| Necropsy Day 6                  | NHP22      |      |      |   |   |   |   |   |      | Face      |           |      |
|                                 | NHP23      |      |      |   |   |   |   |   |      |           |           |      |
|                                 | NHP24      |      |      |   |   |   |   |   |      |           |           |      |

Abbreviations: BL, baseline.

**Table S5 Biscuit consumption (percent)**

| Subject Group                   | Subject ID | BL-1 | BL-2 | 0   | 1   | 2   | 3   | 4  | 5  | 6 | 7 | 8 |
|---------------------------------|------------|------|------|-----|-----|-----|-----|----|----|---|---|---|
| Non-infected Control            | NHP C1     | 56   | 59   | 42  |     |     |     |    |    |   |   |   |
|                                 | NHP C2     | 72   | 67   | 86  |     |     |     |    |    |   |   |   |
|                                 | NHP C3     | 72   | 67   | 56  |     |     |     |    |    |   |   |   |
| Terminal: No Manipulations      | NHP1       | 100  | 100  | 100 | 89  | 86  | 100 | 0  | 8  | 0 |   |   |
|                                 | NHP2       | 50   | 78   | 81  | 47  | 44  | 44  | 0  | 0  | 0 | 0 |   |
|                                 | NHP3       | 50   | 75   | 11  | 5.6 | 11  | 39  | 0  | 0  | 0 | 0 | 0 |
|                                 | NHP4       | 83   | 89   | 100 | 67  | 58  | 31  | 11 | 0  | 0 | 0 | 3 |
|                                 | NHP5       | 100  | 86   | 56  | 17  | 36  | 39  | 8  | 0  |   |   |   |
|                                 | NHP6       | 50   | 53   | 50  | 31  | 28  | 44  | 6  | 6  | 0 | 3 | 3 |
| Terminal: Routine Manipulations | NHP7       | 100  | 100  | 71  | 83  | 92  | 21  | 4  | 4  | 0 | 0 |   |
|                                 | NHP8       | 81   | 61   | 64  | 72  | 39  | 50  | 25 | 0  | 0 |   |   |
|                                 | NHP9       | 100  | 100  | 100 | 83  | 89  | 86  | 0  | 8  | 3 | 0 | 0 |
|                                 | NHP10      | 86   | 50   | 64  | 56  | 53  | 75  | 25 | 0  | 0 | 0 |   |
|                                 | NHP11      | 100  | 94   | 69  | 88  | 63  | 47  | 34 | 0  | 0 |   |   |
|                                 | NHP12      | 64   | 75   | 83  | 89  | 81  | 81  | 36 | 0  | 6 | 0 | 0 |
| Necropsy Day 3                  | NHP13      | 100  | 100  | 100 | 97  | 63  | 100 |    |    |   |   |   |
|                                 | NHP14      | 94   | 100  | 94  | 47  | 34  | 66  |    |    |   |   |   |
|                                 | NHP15      | 50   | 66   | 66  | 56  | 50  | 63  |    |    |   |   |   |
| Necropsy Day 5                  | NHP16      | 44   | 44   | 31  | 13  | 31  | 53  | 0  | 0  |   |   |   |
|                                 | NHP17      | 56   | 44   | 63  | 53  | 41  | 59  | 28 | 25 |   |   |   |
|                                 | NHP18      | 100  | 75   | 79  | 0   | 38  | 75  | 0  | 0  |   |   |   |
| Necropsy Day 4                  | NHP19      | 56   | 59   | 66  | 34  | 63  | 38  | 31 |    |   |   |   |
|                                 | NHP20      | 100  | 100  | 97  | 100 | 100 | 100 | 89 |    |   |   |   |
|                                 | NHP21      | 100  | 100  | 100 | 86  | 78  | 89  | 56 |    |   |   |   |
| Necropsy Day 6                  | NHP22      | 92   | 75   | 88  | 25  | 58  | 33  | 0  | 0  | 0 |   |   |
|                                 | NHP23      | 100  | 100  | 97  | 72  | 92  | 81  | 72 | 0  | 0 |   |   |
|                                 | NHP24      | 44   | 38   | 47  | 19  | 44  | 34  | 16 | 0  | 0 |   |   |

Abbreviations: BL, baseline.

**Table S6 Temperature data (Celsius)**

| Subject Group                   | Subject ID | BL-1 | BL-2 | 0    | 1    | 2    | 3    | 4    | 5    | 6    | 7    | 8    |
|---------------------------------|------------|------|------|------|------|------|------|------|------|------|------|------|
| Non-infected Control            | NHP C1     | 39.8 | 38.8 | 38.3 |      |      |      |      |      |      |      |      |
|                                 | NHP C2     | 39.4 | 38.3 | 38.7 |      |      |      |      |      |      |      |      |
|                                 | NHP C3     | 40.1 | 39.8 | 39.6 |      |      |      |      |      |      |      |      |
| Terminal: No Manipulations      | NHP1       | 38.1 |      | 39.2 |      |      |      |      |      | 39.4 |      |      |
|                                 | NHP2       | 39.8 |      | 39.8 |      |      |      |      |      |      | 35.6 |      |
|                                 | NHP3       | 38.1 |      | 38.6 |      |      |      |      |      |      |      | 39.4 |
|                                 | NHP4       | 38.3 |      | 39.8 |      |      |      |      |      |      | 39.6 |      |
|                                 | NHP5       | 38.7 |      | 39.6 |      |      |      |      | 39.0 |      |      |      |
|                                 | NHP6       | 38.7 |      | 39.1 |      |      |      |      |      |      |      | 38.7 |
| Terminal: Routine Manipulations | NHP7       | 38.8 | 38.9 | 38.6 |      |      | 39.8 |      | 39.0 |      | 35.3 |      |
|                                 | NHP8       | 38.8 | 38.6 | 38.7 |      |      | 39.0 |      | 39.4 | 38.8 |      |      |
|                                 | NHP9       | 39.0 | 39.3 | 39.8 |      |      | 39.7 |      | 40.5 |      |      | 39.2 |
|                                 | NHP10      | 39.7 | 38.7 | 39.7 |      |      | 39.8 |      | 40.1 |      | 39.3 |      |
|                                 | NHP11      | 39.0 | 38.3 | 39.5 |      |      | 40.8 |      | 40.3 | 39.7 |      |      |
|                                 | NHP12      | 39.1 | 39.4 | 39.7 |      |      | 40.0 |      | 40.5 |      |      | 35.2 |
| Necropsy Day 3                  | NHP13      | 39.5 | 38.1 | 39.7 | 40.0 |      | 38.6 |      |      |      |      |      |
|                                 | NHP14      | 38.9 | 38.9 | 39.2 | 39.4 |      | 39.9 |      |      |      |      |      |
|                                 | NHP15      | 39.3 | 39.0 | 39.1 | 39.1 |      | 40.2 |      |      |      |      |      |
| Necropsy Day 5                  | NHP16      | 39.3 | 38.7 | 39.6 | 39.6 |      | 40.1 |      | 39.4 |      |      |      |
|                                 | NHP17      | 39.6 | 38.9 | 39.1 | 39.8 |      | 39.4 |      | 40.1 |      |      |      |
|                                 | NHP18      | 40.0 | 39.4 | 39.4 | 39.7 |      | 40.1 |      | 39.8 |      |      |      |
| Necropsy Day 4                  | NHP19      | 38.6 | 38.5 | 38.8 |      | 39.1 |      | 41.0 |      |      |      |      |
|                                 | NHP20      | 39.1 | 39.0 | 38.8 |      | 38.2 |      | 40.8 |      |      |      |      |
|                                 | NHP21      | 39.1 | 39.0 | 39.3 |      | 38.9 |      | 39.9 |      |      |      |      |
| Necropsy Day 6                  | NHP22      | 38.9 | 39.2 | 40.0 |      | 39.1 |      | 40.8 |      | 38.7 |      |      |
|                                 | NHP23      | 39.7 | 38.7 | 39.8 |      | 39.1 |      | 41.2 |      | 40.2 |      |      |
|                                 | NHP24      | 39.5 | 38.7 | 39.3 |      | 38.8 |      | 39.7 |      | 38.7 |      |      |

Abbreviations: BL, baseline.

**Table S7 Viremia (RT-qPCR)**

| Subject Group                   | Subject ID | BL-1 | 0   | 1   | 2   | 3      | 4      | 5      | 6      | 7      | 8      |
|---------------------------------|------------|------|-----|-----|-----|--------|--------|--------|--------|--------|--------|
| Non-infected Control            | NHP C1     | UND  | UND |     |     |        |        |        |        |        |        |
|                                 | NHP C2     | UND  | UND |     |     |        |        |        |        |        |        |
|                                 | NHP C3     | UND  | UND |     |     |        |        |        |        |        |        |
| Terminal: No Manipulations      | NHP1       | UND  |     |     |     |        |        |        | 3.61E7 |        |        |
|                                 | NHP2       | UND  |     |     |     |        |        |        |        | 4.85E5 |        |
|                                 | NHP3       | UND  |     |     |     |        |        |        |        |        | 1.00E7 |
|                                 | NHP4       | UND  |     |     |     |        |        |        |        | 1.82E6 |        |
|                                 | NHP5       | UND  |     |     |     |        |        | 1.4E5  |        |        |        |
|                                 | NHP6       | UND  |     |     |     |        |        |        |        |        | 1.01E6 |
| Terminal: Routine Manipulations | NHP7       | UND  |     |     |     | 2.97E3 |        | 1.02E7 |        | 2.09E7 |        |
|                                 | NHP8       | UND  |     |     |     | 628    |        | 3.84E6 | 1.93E7 |        |        |
|                                 | NHP9       | UND  |     |     |     | 105E3  |        | 5.24E5 |        |        | 1.52E6 |
|                                 | NHP10      | UND  |     |     |     | 895    |        | 3.18E5 |        | 2.59E6 |        |
|                                 | NHP11      | UND  |     |     |     | 743    |        | 3.53E5 | 5.73E6 |        |        |
|                                 | NHP12      | UND  |     |     |     | 647    |        | 3.50E6 |        |        | 1.16E7 |
| Necropsy Day 3                  | NHP13      | UND  |     | UND |     | 77     |        |        |        |        |        |
|                                 | NHP14      | UND  |     | UND |     | 819    |        |        |        |        |        |
|                                 | NHP15      | UND  |     | UND |     | 183    |        |        |        |        |        |
| Necropsy Day 5                  | NHP16      | UND  |     | UND |     | 435    |        | 1.66E5 |        |        |        |
|                                 | NHP17      | UND  |     | UND |     | 2.47   |        | 949    |        |        |        |
|                                 | NHP18      | UND  |     | UND |     | 314    |        | 1.07E6 |        |        |        |
| Necropsy Day 4                  | NHP19      | UND  |     |     | UND |        | 4.62E5 |        |        |        |        |
|                                 | NHP20      | UND  |     |     | UND |        | 2.51E3 |        |        |        |        |
|                                 | NHP21      | UND  |     |     | UND |        | 3.23E3 |        |        |        |        |
| Necropsy Day 6                  | NHP22      | UND  |     |     | UND |        | 1.36E5 |        | 4.41E7 |        |        |
|                                 | NHP23      | UND  |     |     | UND |        | 1.14E5 |        | 4.52E5 |        |        |
|                                 | NHP24      | UND  |     |     | UND |        | 3.63E4 |        | 7.65E6 |        |        |

Abbreviations: BL, baseline; UND, undetected.



**Table S8 Virus in oral swabs (RT-qPCR)**

| Subject Group                   | Subject ID | BL-1 | BL-2 | 0   | 1   | 2   | 3   | 4   | 5      | 6      | 7      | 8      |
|---------------------------------|------------|------|------|-----|-----|-----|-----|-----|--------|--------|--------|--------|
| Non-infected Control            | NHP C1     | UND  |      | UND |     |     |     |     |        |        |        |        |
|                                 | NHP C2     | UND  |      | UND |     |     |     |     |        |        |        |        |
|                                 | NHP C3     | UND  |      | UND |     |     |     |     |        |        |        |        |
| Terminal: No Manipulations      | NHP1       | UND  |      |     |     |     |     |     |        | 4.92E5 |        |        |
|                                 | NHP2       | UND  |      |     |     |     |     |     |        |        | 8.75E6 |        |
|                                 | NHP3       | UND  |      |     |     |     |     |     |        |        |        | 6.75E6 |
|                                 | NHP4       | UND  |      |     |     |     |     |     |        |        |        | 4.66E6 |
|                                 | NHP5       | UND  |      |     |     |     |     |     |        | 2.0E6  |        |        |
|                                 | NHP6       | UND  |      |     |     |     |     |     |        |        | 2.44E7 |        |
| Terminal: Routine Manipulations | NHP7       |      | UND  |     |     |     | UND |     | UND    |        | 5.25E6 |        |
|                                 | NHP8       |      | UND  |     |     |     | UND |     | 2.14E5 | 5.51E5 |        |        |
|                                 | NHP9       |      | UND  |     |     |     | UND |     | 1.19E5 |        |        | 2.73E7 |
|                                 | NHP10      |      | UND  |     |     |     | UND |     | 2.68E4 |        | 7.13E6 |        |
|                                 | NHP11      |      | UND  |     |     |     | UND |     | UND    | 4.34E5 |        |        |
|                                 | NHP12      |      | UND  |     |     |     | UND |     | UND    |        |        | 3,10E7 |
| Necropsy Day 3                  | NHP13      |      | UND  |     | UND |     | UND |     |        |        |        |        |
|                                 | NHP14      |      | UND  |     | UND |     | UND |     |        |        |        |        |
|                                 | NHP15      |      | UND  |     | UND |     | UND |     |        |        |        |        |
| Necropsy Day 5                  | NHP16      | UND  |      |     | UND |     | UND |     | UND    |        |        |        |
|                                 | NHP17      | UND  |      |     | UND |     | UND |     | UND    |        |        |        |
|                                 | NHP18      | UND  |      |     | UND |     | UND |     | UND    |        |        |        |
| Necropsy Day 4                  | NHP19      | UND  |      |     |     | UND |     | UND |        |        |        |        |
|                                 | NHP20      | UND  |      |     |     | UND |     | UND |        |        |        |        |
|                                 | NHP21      | UND  |      |     |     | UND |     | UND |        |        |        |        |
| Necropsy Day 6                  | NHP22      | UND  |      |     |     | UND |     | UND |        |        |        |        |
|                                 | NHP23      | UND  |      |     |     | UND |     | UND |        |        |        |        |
|                                 | NHP24      | UND  |      |     |     | UND |     | UND |        |        |        |        |

Abbreviations: BL, baseline; UND, undetected.

**Table S9 Alanine Aminotransferase (units)**

| Subject Group                   | Subject ID | BL-1 | BL-2 | 1  | 2  | 3  | 4  | 5   | 6   | 7    | 8   |
|---------------------------------|------------|------|------|----|----|----|----|-----|-----|------|-----|
| Non-infected Control            | NHP C1     | 31   | 30   |    |    |    |    |     |     |      |     |
|                                 | NHP C2     | 36   | 28   |    |    |    |    |     |     |      |     |
|                                 | NHP C3     | 46   | 52   |    |    |    |    |     |     |      |     |
| Terminal: No Manipulations      | NHP1       | 33   | 42   |    |    |    |    |     | 207 |      |     |
|                                 | NHP2       | 33   | 34   |    |    |    |    |     |     | 188  |     |
|                                 | NHP3       | 26   | 23   |    |    |    |    |     |     |      | 177 |
|                                 | NHP4       | 54   | 31   |    |    |    |    |     |     | 330  |     |
|                                 | NHP5       | 29   | 29   |    |    |    |    | 342 |     |      |     |
|                                 | NHP6       | 32   | 31   |    |    |    |    |     |     |      | 379 |
| Terminal: Routine Manipulations | NHP7       | 41   | 32   |    |    | 34 |    | 665 |     | 1261 |     |
|                                 | NHP8       | 41   | 51   |    |    | 60 |    | 124 | 340 |      |     |
|                                 | NHP9       | 24   | 34   |    |    | 26 |    | 68  |     |      | 185 |
|                                 | NHP10      | 39   | 49   |    |    | 63 |    | 102 |     | 253  |     |
|                                 | NHP11      | 45   | 54   |    |    | 31 |    | 60  | 240 |      |     |
|                                 | NHP12      | 44   | 47   |    |    | 47 |    | 121 |     |      | 740 |
| Necropsy Day 3                  | NHP13      | 47   | 53   | 63 |    | 55 |    |     |     |      |     |
|                                 | NHP14      | 40   | 37   | 47 |    | 42 |    |     |     |      |     |
|                                 | NHP15      | 33   | 30   | 31 |    | 31 |    |     |     |      |     |
| Necropsy Day 5                  | NHP16      | 39   | 41   | 58 |    | 52 |    | 90  |     |      |     |
|                                 | NHP17      | 29   | 29   | 39 |    | 34 |    | 42  |     |      |     |
|                                 | NHP18      | 20   | 18   | 45 |    |    |    | 277 |     |      |     |
| Necropsy Day 4                  | NHP19      | 51   | 39   |    | 62 |    | 52 |     |     |      |     |
|                                 | NHP20      | 30   | 29   |    | 52 |    | 51 |     |     |      |     |
|                                 | NHP21      | 43   | 46   |    | 53 |    | 42 |     |     |      |     |
| Necropsy Day 6                  | NHP22      | 13   | 10   |    | 22 |    | 21 |     | 126 |      |     |
|                                 | NHP23      | 30   | 32   |    | 41 |    | 41 |     | 143 |      |     |
|                                 | NHP24      | 48   | 28   |    | 38 |    | 45 |     | 715 |      |     |

Abbreviations: BL, baseline.

**Table S10 Albumin**

| Subject Group                   | Subject ID | BL-1 | BL-2 | 1   | 2   | 3   | 4   | 5   | 6   | 7   | 8   |
|---------------------------------|------------|------|------|-----|-----|-----|-----|-----|-----|-----|-----|
| Non-infected Control            | NHP C1     | 3.3  | 3.6  |     |     |     |     |     |     |     |     |
|                                 | NHP C2     | 3.6  | 3.2  |     |     |     |     |     |     |     |     |
|                                 | NHP C3     | 3.7  | 3.4  |     |     |     |     |     |     |     |     |
| Terminal: No Manipulations      | NHP1       | 3.2  | 3.4  |     |     |     |     |     | 2   |     |     |
|                                 | NHP2       | 4    | 3.9  |     |     |     |     |     |     | 1.9 |     |
|                                 | NHP3       | 3.4  | 3.2  |     |     |     |     |     |     |     | 2.1 |
|                                 | NHP4       | 3.9  | 3.6  |     |     |     |     |     |     | 2.1 |     |
|                                 | NHP5       | 4.1  | 3.9  |     |     |     |     | 2.4 |     |     |     |
|                                 | NHP6       | 3.4  | 3.3  |     |     |     |     |     |     |     | 2.2 |
| Terminal: Routine Manipulations | NHP7       | 2.7  | 2.7  |     |     | 2.6 |     | 2   |     | 1.6 |     |
|                                 | NHP8       | 3.2  | 3.4  |     |     | 3.5 |     | 3   | 2.8 |     |     |
|                                 | NHP9       | 3.5  | 3.5  |     |     | 3.4 |     | 2.7 |     |     | 2.2 |
|                                 | NHP10      | 3.5  | 3.4  |     |     | 3.3 |     | 2.7 |     | 2   |     |
|                                 | NHP11      | 2.7  | 2.7  |     |     | 2.4 |     | 1.9 | 1.9 |     |     |
|                                 | NHP12      | 3.9  | 3.7  |     |     | 3.3 |     | 3   |     |     | 2.3 |
| Necropsy Day 3                  | NHP13      | 3.5  | 3.5  | 3.3 |     | 3.1 |     |     |     |     |     |
|                                 | NHP14      | 3.4  | 3.2  | 3.2 |     | 3.5 |     |     |     |     |     |
|                                 | NHP15      | 3.5  | 3.2  | 3.4 |     | 3.8 |     |     |     |     |     |
| Necropsy Day 5                  | NHP16      | 3.4  | 3.2  | 3.5 |     | 3.6 |     | 2.8 |     |     |     |
|                                 | NHP17      | 3.7  | 3.5  | 3.5 |     | 3.7 |     | 2.9 |     |     |     |
|                                 | NHP18      | 3.6  | 3.6  | 3.7 |     |     |     | 2.9 |     |     |     |
| Necropsy Day 4                  | NHP19      | 3.6  | 3.4  |     | 3.3 |     | 3.2 |     |     |     |     |
|                                 | NHP20      | 3.6  | 3.3  |     | 3.1 |     | 3.3 |     |     |     |     |
|                                 | NHP21      | 4.1  | 3.9  |     | 3.8 |     | 3.2 |     |     |     |     |
| Necropsy Day 6                  | NHP22      | 3.4  | 3.3  |     | 3.2 |     | 3.3 |     | 2.3 |     |     |
|                                 | NHP23      | 3.7  | 3.8  |     | 3.6 |     | 3.5 |     | 2.9 |     |     |
|                                 | NHP24      | 3.7  | 3.5  |     | 3.5 |     | 3.9 |     | 2.7 |     |     |

Abbreviations: BL, baseline.

**Table S11 Albumin:Globulin (Ratio)**

| Subject Group                   | Subject ID | BL-1 | BL-2 | 1    | 2    | 3    | 4    | 5    | 6    | 7    | 8    |
|---------------------------------|------------|------|------|------|------|------|------|------|------|------|------|
| Non-infected Control            | NHP C1     | 0.94 | 1.16 |      |      |      |      |      |      |      |      |
|                                 | NHP C2     | 0.92 | 0.89 |      |      |      |      |      |      |      |      |
|                                 | NHP C3     | 1.16 | 1.10 |      |      |      |      |      |      |      |      |
| Terminal: No Manipulations      | NHP1       | 0.89 | 1.03 |      |      |      |      |      | 0.50 |      |      |
|                                 | NHP2       | 1.08 | 1.15 |      |      |      |      |      |      | 0.54 |      |
|                                 | NHP3       | 0.79 | 0.89 |      |      |      |      |      |      |      | 0.54 |
|                                 | NHP4       | 0.91 | 1.00 |      |      |      |      |      |      | 0.51 |      |
|                                 | NHP5       | 1.11 | 1.30 |      |      |      |      | 0.42 |      |      |      |
|                                 | NHP6       | 0.92 | 1.00 |      |      |      |      |      |      |      | 0.59 |
| Terminal: Routine Manipulations | NHP7       | 0.93 | 1.00 |      |      | 0.74 |      | 0.54 |      | 0.47 |      |
|                                 | NHP8       | 0.91 | 1.03 |      |      | 1.00 |      | 0.81 | 0.74 |      |      |
|                                 | NHP9       | 1.00 | 1.17 |      |      | 1.03 |      | 0.82 |      |      | 0.61 |
|                                 | NHP10      | 1.03 | 1.03 |      |      | 0.92 |      | 0.79 |      | 0.63 |      |
|                                 | NHP11      | 0.73 | 0.77 |      |      | 0.65 |      | 0.53 | 0.49 |      |      |
|                                 | NHP12      | 1.05 | 1.16 |      |      | 0.87 |      | 0.75 |      |      | 0.53 |
| Necropsy Day 3                  | NHP13      | 0.97 | 0.95 | 0.92 |      | 0.97 |      |      |      |      |      |
|                                 | NHP14      | 1.03 | 0.91 | 0.94 |      | 1.06 |      |      |      |      |      |
|                                 | NHP15      | 1.13 | 0.97 | 0.94 |      | 1.36 |      |      |      |      |      |
| Necropsy Day 5                  | NHP16      | 0.92 | 0.97 | 0.92 |      | 1.06 |      | 0.76 |      |      |      |
|                                 | NHP17      | 1.19 | 1.13 | 1.13 |      | 1.42 |      | 0.97 |      |      |      |
|                                 | NHP18      | 0.9  | 0.88 | 0.88 |      |      |      | 0.78 |      |      |      |
| Necropsy Day 4                  | NHP19      | 1.03 | 1.03 |      | 0.97 |      | 0.89 |      |      |      |      |
|                                 | NHP20      | 1.00 | 1.03 |      | 0.89 |      | 0.94 |      |      |      |      |
|                                 | NHP21      | 1.24 | 1.18 |      | 1.09 |      | 0.97 |      |      |      |      |
| Necropsy Day 6                  | NHP22      | 0.77 | 0.80 |      | 0.71 |      | 0.70 |      | 0.46 |      |      |
|                                 | NHP23      | 0.97 | 1.03 |      | 0.90 |      | 0.78 |      | 0.71 |      |      |
|                                 | NHP24      | 1.12 | 1.13 |      | 0.97 |      | 1.03 |      | 0.82 |      |      |

Abbreviations: BL, baseline.

**Table S12 Alkaline Phosphatase**

| Subject Group                   | Subject ID | BL-1 | BL-2 | 1   | 2   | 3   | 4   | 5   | 6   | 7    | 8    |
|---------------------------------|------------|------|------|-----|-----|-----|-----|-----|-----|------|------|
| Non-infected Control            | NHP C1     | 65   | 69   |     |     |     |     |     |     |      |      |
|                                 | NHP C2     | 154  | 135  |     |     |     |     |     |     |      |      |
|                                 | NHP C3     | 355  | 326  |     |     |     |     |     |     |      |      |
| Terminal: No Manipulations      | NHP1       | 166  | 164  |     |     |     |     |     | 415 |      |      |
|                                 | NHP2       | 139  | 130  |     |     |     |     |     |     | 1249 |      |
|                                 | NHP3       | 127  | 85   |     |     |     |     |     |     |      | 522  |
|                                 | NHP4       | 256  | 168  |     |     |     |     |     |     | 1789 |      |
|                                 | NHP5       | 199  | 183  |     |     |     |     | 458 |     |      |      |
|                                 | NHP6       | 93   | 84   |     |     |     |     |     |     |      | 462  |
| Terminal: Routine Manipulations | NHP7       | 63   | 83   |     |     | 136 |     | 560 |     | 659  |      |
|                                 | NHP8       | 127  | 137  |     |     | 154 |     | 266 | 637 |      |      |
|                                 | NHP9       | 181  | 152  |     |     | 158 |     | 261 |     |      | 765  |
|                                 | NHP10      | 82   | 81   |     |     | 100 |     | 155 |     | 600  |      |
|                                 | NHP11      | 164  | 157  |     |     | 187 |     | 305 | 890 |      |      |
|                                 | NHP12      | 395  | 354  |     |     | 333 |     | 353 |     |      | 1666 |
| Necropsy Day 3                  | NHP13      | 250  | 206  | 197 |     | 183 |     |     |     |      |      |
|                                 | NHP14      | 117  | 102  | 123 |     | 121 |     |     |     |      |      |
|                                 | NHP15      | 190  | 178  | 189 |     | 191 |     |     |     |      |      |
| Necropsy Day 5                  | NHP16      | 106  | 106  | 115 |     | 116 |     | 143 |     |      |      |
|                                 | NHP17      | 128  | 130  | 141 |     | 142 |     | 142 |     |      |      |
|                                 | NHP18      | 108  | 94   | 88  |     |     |     | 348 |     |      |      |
| Necropsy Day 4                  | NHP19      | 114  | 124  |     | 103 |     | 144 |     |     |      |      |
|                                 | NHP20      | 117  | 115  |     | 97  |     | 116 |     |     |      |      |
|                                 | NHP21      | 322  | 280  |     | 271 |     | 245 |     |     |      |      |
| Necropsy Day 6                  | NHP22      | 153  | 152  |     | 152 |     | 229 |     | 510 |      |      |
|                                 | NHP23      | 150  | 167  |     | 148 |     | 141 |     | 197 |      |      |
|                                 | NHP24      | 109  | 126  |     | 111 |     | 135 |     | 952 |      |      |

Abbreviations: BL, baseline.

**Table S13 Amylase**

| Subject Group                   | Subject ID | BL-1 | BL-2 | 1   | 2   | 3   | 4   | 5   | 6   | 7   | 8   |
|---------------------------------|------------|------|------|-----|-----|-----|-----|-----|-----|-----|-----|
| Non-infected Control            | NHP C1     | 208  | 191  |     |     |     |     |     |     |     |     |
|                                 | NHP C2     | 372  | 353  |     |     |     |     |     |     |     |     |
|                                 | NHP C3     | 628  | 657  |     |     |     |     |     |     |     |     |
| Terminal: No Manipulations      | NHP1       | 351  | 372  |     |     |     |     |     | 732 |     |     |
|                                 | NHP2       | 354  | 354  |     |     |     |     |     |     | 690 |     |
|                                 | NHP3       | 868  | 904  |     |     |     |     |     |     |     | 350 |
|                                 | NHP4       | 483  | 437  |     |     |     |     |     |     | 291 |     |
|                                 | NHP5       | 386  | 422  |     |     |     |     | 364 |     |     |     |
|                                 | NHP6       | 238  | 263  |     |     |     |     |     |     |     | 210 |
| Terminal: Routine Manipulations | NHP7       | 416  | 413  |     |     | 341 |     | 209 |     | 409 |     |
|                                 | NHP8       | 252  | 225  |     |     | 248 |     | 167 | 158 |     |     |
|                                 | NHP9       | 479  | 460  |     |     | 470 |     | 329 |     |     | 232 |
|                                 | NHP10      | 386  | 492  |     |     | 389 |     | 187 |     | 192 |     |
|                                 | NHP11      | 351  | 279  |     |     | 299 |     | 203 | 418 |     |     |
|                                 | NHP12      | 458  | 358  |     |     | 445 |     | 256 |     |     | 702 |
| Necropsy Day 3                  | NHP13      | 433  | 406  | 436 |     | 371 |     |     |     |     |     |
|                                 | NHP14      | 327  | 329  | 655 |     | 337 |     |     |     |     |     |
|                                 | NHP15      | 291  | 340  | 274 |     | 250 |     |     |     |     |     |
| Necropsy Day 5                  | NHP16      | 229  | 235  | 369 |     | 208 |     | 142 |     |     |     |
|                                 | NHP17      | 411  | 407  | 371 |     | 348 |     | 255 |     |     |     |
|                                 | NHP18      | 355  | 307  | 329 |     |     |     | 139 |     |     |     |
| Necropsy Day 4                  | NHP19      | 298  | 253  |     | 306 |     | 244 |     |     |     |     |
|                                 | NHP20      | 464  | 408  |     | 385 |     | 383 |     |     |     |     |
|                                 | NHP21      | 349  | 331  |     | 347 |     | 275 |     |     |     |     |
| Necropsy Day 6                  | NHP22      | 456  | 378  |     | 431 |     | 286 |     | 370 |     |     |
|                                 | NHP23      | 458  | 459  |     | 474 |     | 437 |     | 456 |     |     |
|                                 | NHP24      | 418  | 384  |     | 422 |     | 315 |     | 163 |     |     |

Abbreviations: BL, baseline.

**Table S14 Aspartate Aminotransferase**

| Subject Group                   | Subject ID | BL-1 | BL-2 | 1  | 2  | 3  | 4  | 5    | 6    | 7   | 8    |
|---------------------------------|------------|------|------|----|----|----|----|------|------|-----|------|
| Non-infected Control            | NHP C1     | 32   | 27   |    |    |    |    |      |      |     |      |
|                                 | NHP C2     | 29   | 31   |    |    |    |    |      |      |     |      |
|                                 | NHP C3     | 42   | 41   |    |    |    |    |      |      |     |      |
| Terminal: No Manipulations      | NHP1       | 30   | 45   |    |    |    |    |      | 502  |     |      |
|                                 | NHP2       | 42   | 35   |    |    |    |    |      |      | 791 |      |
|                                 | NHP3       | 23   | 22   |    |    |    |    |      |      |     | 631  |
|                                 | NHP4       | 50   | 33   |    |    |    |    |      |      | 656 |      |
|                                 | NHP5       | 42   | 31   |    |    |    |    | 1396 |      |     |      |
|                                 | NHP6       | 40   | 35   |    |    |    |    |      |      |     | 1386 |
| Terminal: Routine Manipulations | NHP7       | 32   | 32   |    |    | 34 |    | 1325 |      | O   |      |
|                                 | NHP8       | 38   | 36   |    |    | 35 |    | 334  | 1154 |     |      |
|                                 | NHP9       | 37   | 41   |    |    | 36 |    | 215  |      |     | 906  |
|                                 | NHP10      | 35   | 38   |    |    | 97 |    | 218  |      | 795 |      |
|                                 | NHP11      | 36   | 33   |    |    | 30 |    | 202  | 641  |     |      |
|                                 | NHP12      | 30   | 41   |    |    | 28 |    | 254  |      |     | 1963 |
| Necropsy Day 3                  | NHP13      | 36   | 36   | 52 |    | 45 |    |      |      |     |      |
|                                 | NHP14      | 41   | 38   | 95 |    | 45 |    |      |      |     |      |
|                                 | NHP15      | 28   | 33   | 36 |    | 30 |    |      |      |     |      |
| Necropsy Day 5                  | NHP16      | 39   | 33   | 75 |    | 48 |    | 176  |      |     |      |
|                                 | NHP17      | 36   | 38   | 64 |    | 49 |    | 45   |      |     |      |
|                                 | NHP18      | 28   | 29   | 70 |    |    |    | 615  |      |     |      |
| Necropsy Day 4                  | NHP19      | 37   | 31   |    | 41 |    | 56 |      |      |     |      |
|                                 | NHP20      | 35   | 32   |    | 38 |    | 40 |      |      |     |      |
|                                 | NHP21      | 39   | 39   |    | 43 |    | 57 |      |      |     |      |
| Necropsy Day 6                  | NHP22      | 30   | 25   |    | 36 |    | 24 |      | 868  |     |      |
|                                 | NHP23      | 46   | 45   |    | 36 |    | 62 |      | 311  |     |      |
|                                 | NHP24      | 34   | 24   |    | 25 |    | 55 |      | 1590 |     |      |

Abbreviations: BL, baseline; O, Outside the reference range.

**Table S15 Blood Urea Nitrogen**

| Subject Group                   | Subject ID | BL-1 | BL-2 | 1  | 2  | 3  | 4  | 5  | 6  | 7    | 8   |
|---------------------------------|------------|------|------|----|----|----|----|----|----|------|-----|
| Non-infected Control            | NHP C1     | 16   | 19   |    |    |    |    |    |    |      |     |
|                                 | NHP C2     | 18   | 19   |    |    |    |    |    |    |      |     |
|                                 | NHP C3     | 23   | 25   |    |    |    |    |    |    |      |     |
| Terminal: No Manipulations      | NHP1       | 20   | 19   |    |    |    |    |    | 31 |      |     |
|                                 | NHP2       | 19   | 25   |    |    |    |    |    |    | >180 |     |
|                                 | NHP3       | 16   | 11   |    |    |    |    |    |    |      | 28  |
|                                 | NHP4       | 22   | 20   |    |    |    |    |    |    | 89   |     |
|                                 | NHP5       | 25   | 19   |    |    |    |    | 95 |    |      |     |
|                                 | NHP6       | 14   | 11   |    |    |    |    |    |    |      | 37  |
| Terminal: Routine Manipulations | NHP7       | 20   | 22   |    |    | 11 |    | 37 |    | >180 |     |
|                                 | NHP8       | 12   | 13   |    |    | 10 |    | 9  | 27 |      |     |
|                                 | NHP9       | 19   | 22   |    |    | 18 |    | 8  |    |      |     |
|                                 | NHP10      | 20   | 20   |    |    | 17 |    | 13 |    | 22   |     |
|                                 | NHP11      | 13   | 15   |    |    | 10 |    | 9  | 21 |      |     |
|                                 | NHP12      | 19   | 27   |    |    | 20 |    | 15 |    |      | 159 |
| Necropsy Day 3                  | NHP13      | 19   | 26   | 23 |    | 21 |    |    |    |      |     |
|                                 | NHP14      | 23   | 22   | 18 |    | 19 |    |    |    |      |     |
|                                 | NHP15      | 17   | 17   | 17 |    | 18 |    |    |    |      |     |
| Necropsy Day 5                  | NHP16      | 18   | 20   | 18 |    | 19 |    | 17 |    |      |     |
|                                 | NHP17      | 12   | 17   | 12 |    | 18 |    | 13 |    |      |     |
|                                 | NHP18      | 15   | 20   | 13 |    |    |    | 11 |    |      |     |
| Necropsy Day 4                  | NHP19      | 15   | 16   |    | 12 |    | 14 |    |    |      |     |
|                                 | NHP20      | 18   | 19   |    | 19 |    | 18 |    |    |      |     |
|                                 | NHP21      | 17   | 16   |    | 17 |    | 17 |    |    |      |     |
| Necropsy Day 6                  | NHP22      | 23   | 23   |    | 18 |    | 16 |    | 45 |      |     |
|                                 | NHP23      | 19   | 17   |    | 17 |    | 14 |    | 17 |      |     |
|                                 | NHP24      | 25   | 19   |    | 19 |    | 16 |    | 37 |      |     |

Abbreviations: BL, baseline.



**Table S16 BUN:Creatinine**

| Subject Group                   | Subject ID | BL-1  | BL-2  | 1     | 2     | 3     | 4     | 5     | 6     | 7     | 8     |
|---------------------------------|------------|-------|-------|-------|-------|-------|-------|-------|-------|-------|-------|
| Non-infected Control            | NHP C1     | 26.67 | 23.75 |       |       |       |       |       |       |       |       |
|                                 | NHP C2     | 18    | 27.14 |       |       |       |       |       |       |       |       |
|                                 | NHP C3     | 23    | 31.25 |       |       |       |       |       |       |       |       |
| Terminal: No Manipulations      | NHP1       | 28.57 | 23.75 |       |       |       |       | 14.09 |       |       |       |
|                                 | NHP2       | 19    | 27.78 |       |       |       |       |       |       | 0     |       |
|                                 | NHP3       | 22.86 | 15.71 |       |       |       |       |       |       |       | 21.54 |
|                                 | NHP4       | 24.44 | 20    |       |       |       |       |       |       | 19.35 |       |
|                                 | NHP5       | 25    | 21.11 |       |       |       |       | 17.92 |       |       |       |
|                                 | NHP6       | 15.56 | 13.75 |       |       |       |       |       |       |       | 16.82 |
| Terminal: Routine Manipulations | NHP7       | 20    | 24.44 |       |       | 13.75 |       | 16.82 |       | 0     |       |
|                                 | NHP8       | 13.33 | 18.57 |       |       | 16.67 |       | 9     | 19.29 |       |       |
|                                 | NHP9       | 17.27 | 24.44 |       |       | 16.36 |       | 6.15  |       |       | 15.83 |
|                                 | NHP10      | 22.22 | 25    |       |       | 21.25 |       | 11.82 |       | 16.92 |       |
|                                 | NHP11      | 14.44 | 18.75 |       |       | 11.11 |       | 8.18  | 13.13 |       |       |
|                                 | NHP12      | 21.11 | 33.75 |       |       | 28.57 |       | 13.64 |       |       | 18.71 |
| Necropsy Day 3                  | NHP13      | 23.75 | 23.64 | 38.33 |       | 26.25 |       |       |       |       |       |
|                                 | NHP14      | 28.75 | 27.5  | 30    |       | 21.11 |       |       |       |       |       |
|                                 | NHP15      | 18.89 | 24.29 | 34    |       | 22.5  |       |       |       |       |       |
| Necropsy Day 5                  | NHP16      | 20    | 20    | 25.71 |       | 19    |       | 14.17 |       |       |       |
|                                 | NHP17      | 13.33 | 18.89 | 20    |       | 25.71 |       | 16.25 |       |       |       |
|                                 | NHP18      | 25    | 28.57 | 32.5  |       |       |       | 9.17  |       |       |       |
| Necropsy Day 4                  | NHP19      | 21.43 | 20    |       | 17.14 |       | 12.73 |       |       |       |       |
|                                 | NHP20      | 22.5  | 23.75 |       | 31.67 |       | 15    |       |       |       |       |
|                                 | NHP21      | 24.29 | 26.67 |       | 28.33 |       | 15.45 |       |       |       |       |
| Necropsy Day 6                  | NHP22      | 28.75 | 28.75 |       | 25.71 |       | 16    |       | 8.33  |       |       |
|                                 | NHP23      | 21.11 | 18.89 |       | 24.29 |       | 15.56 |       | 10.63 |       |       |
|                                 | NHP24      | 41.67 | 31.67 |       | 31.67 |       | 20    |       | 26.43 |       |       |

Abbreviations: BL, baseline.

Table S17 Calcium (mg/dL)

| Subject Group                   | Subject ID | BL-1 | BL-2 | 1    | 2    | 3   | 4   | 5   | 6   | 7   | 8   |
|---------------------------------|------------|------|------|------|------|-----|-----|-----|-----|-----|-----|
| Non-infected Control            | NHP C1     | 9.5  | 9.5  |      |      |     |     |     |     |     |     |
|                                 | NHP C2     | 9.2  | 9.3  |      |      |     |     |     |     |     |     |
|                                 | NHP C3     | 9.4  | 9.6  |      |      |     |     |     |     |     |     |
| Terminal: No Manipulations      | NHP1       | 9.1  | 9    |      |      |     |     |     | 7.1 |     |     |
|                                 | NHP2       | 9.8  | 9.9  |      |      |     |     |     |     | 4.9 |     |
|                                 | NHP3       | 9.2  | 9.2  |      |      |     |     |     |     |     | 7.7 |
|                                 | NHP4       | 10   | 9.8  |      |      |     |     |     |     | 5.8 |     |
|                                 | NHP5       | 9.9  | 9.5  |      |      |     |     | 6.8 |     |     |     |
|                                 | NHP6       | 9.1  | 8.6  |      |      |     |     |     |     |     | 7.8 |
| Terminal: Routine Manipulations | NHP7       | 8.8  | 9    |      |      | 9.1 |     | 7.9 |     | 5.1 |     |
|                                 | NHP8       | 9.6  | 9.6  |      |      | 10  |     | 8.3 | 7.6 |     |     |
|                                 | NHP9       | 9.7  | 9.5  |      |      | 9.4 |     | 7.9 |     |     | 7.9 |
|                                 | NHP10      | 9.2  | 9.1  |      |      | 9.2 |     | 8.3 |     | 8.1 |     |
|                                 | NHP11      | 8.8  | 9.2  |      |      | 8.4 |     | 7.8 | 8   |     |     |
|                                 | NHP12      | 9.6  | 9.5  |      |      | 9.6 |     | 8.4 |     |     | 8.8 |
| Necropsy Day 3                  | NHP13      | 9.7  | 9.7  | 9.9  |      | 9.1 |     |     |     |     |     |
|                                 | NHP14      | 9.1  | 9.6  | 9.6  |      | 9.1 |     |     |     |     |     |
|                                 | NHP15      | 9.2  | 9.1  | 9.5  |      | 9.1 |     |     |     |     |     |
| Necropsy Day 5                  | NHP16      | 9.4  | 9.4  | 9.9  |      | 9.2 |     | 8.9 |     |     |     |
|                                 | NHP17      | 9.5  | 9.6  | 10.1 |      | 9   |     | 9.1 |     |     |     |
|                                 | NHP18      | 9.6  | 9.9  | 9.7  |      |     |     | 8.4 |     |     |     |
| Necropsy Day 4                  | NHP19      | 9.6  | 9.3  |      | 9.7  |     | 9.1 |     |     |     |     |
|                                 | NHP20      | 9.6  | 9.5  |      | 9.8  |     | 9   |     |     |     |     |
|                                 | NHP21      | 10.4 | 9.9  |      | 10   |     | 9.3 |     |     |     |     |
| Necropsy Day 6                  | NHP22      | 9.4  | 9.2  |      | 9.2  |     | 8.7 |     | 7   |     |     |
|                                 | NHP23      | 9.8  | 9.6  |      | 10.2 |     | 9.6 |     | 8.6 |     |     |
|                                 | NHP24      | 9.4  | 9.2  |      | 9.7  |     | 9.2 |     | 7.8 |     |     |

Abbreviations: BL, baseline.

Table S18 Creatinine (mg/dL)

| Subject Group                   | Subject ID | BL-1 | BL-2 | 1   | 2   | 3   | 4   | 5   | 6   | 7    | 8   |
|---------------------------------|------------|------|------|-----|-----|-----|-----|-----|-----|------|-----|
| Non-infected Control            | NHP C1     | 0.6  | 0.8  |     |     |     |     |     |     |      |     |
|                                 | NHP C2     | 1    | 0.7  |     |     |     |     |     |     |      |     |
|                                 | NHP C3     | 1    | 0.8  |     |     |     |     |     |     |      |     |
| Terminal: No Manipulations      | NHP1       | 0.7  | 0.8  |     |     |     |     |     | 2.2 |      |     |
|                                 | NHP2       | 1    | 0.9  |     |     |     |     |     |     | 13.5 |     |
|                                 | NHP3       | 0.7  | 0.7  |     |     |     |     |     |     |      | 1.3 |
|                                 | NHP4       | 0.9  | 1    |     |     |     |     |     |     | 4.6  |     |
|                                 | NHP5       | 1    | 0.9  |     |     |     |     | 5.3 |     |      |     |
|                                 | NHP6       | 0.9  | 0.8  |     |     |     |     |     |     |      | 2.2 |
| Terminal: Routine Manipulations | NHP7       | 1    | 0.9  |     |     | 0.8 |     | 2.2 |     | 9.7  |     |
|                                 | NHP8       | 0.9  | 0.7  |     |     | 0.6 |     | 1   | 1.4 |      |     |
|                                 | NHP9       | 1.1  | 0.9  |     |     | 1.1 |     | 1.3 |     |      | 2.4 |
|                                 | NHP10      | 0.9  | 0.8  |     |     | 0.8 |     | 1.1 |     | 1.3  |     |
|                                 | NHP11      | 0.9  | 0.8  |     |     | 0.9 |     | 1.1 | 1.6 |      |     |
|                                 | NHP12      | 0.9  | 0.8  |     |     | 0.7 |     | 1.1 |     |      | 8.5 |
| Necropsy Day 3                  | NHP13      | 0.8  | 1.1  | 0.6 |     | 0.8 |     |     |     |      |     |
|                                 | NHP14      | 0.8  | 0.8  | 0.6 |     | 0.9 |     |     |     |      |     |
|                                 | NHP15      | 0.9  | 0.7  | 0.5 |     | 0.8 |     |     |     |      |     |
| Necropsy Day 5                  | NHP16      | 0.9  | 1    | 0.7 |     | 1   |     | 1.2 |     |      |     |
|                                 | NHP17      | 0.9  | 0.9  | 0.6 |     | 0.7 |     | 0.8 |     |      |     |
|                                 | NHP18      | 0.6  | 0.7  | 0.4 |     |     |     | 1.2 |     |      |     |
| Necropsy Day 4                  | NHP19      | 0.7  | 0.8  |     | 0.7 |     | 1.1 |     |     |      |     |
|                                 | NHP20      | 0.8  | 0.8  |     | 0.6 |     | 1.2 |     |     |      |     |
|                                 | NHP21      | 0.7  | 0.6  |     | 0.6 |     | 1.1 |     |     |      |     |
| Necropsy Day 6                  | NHP22      | 0.8  | 0.8  |     | 0.7 |     | 1   |     | 5.4 |      |     |
|                                 | NHP23      | 0.9  | 0.9  |     | 0.7 |     | 0.9 |     | 1.6 |      |     |
|                                 | NHP24      | 0.6  | 0.6  |     | 0.6 |     | 0.8 |     | 1.4 |      |     |

Abbreviations: BL, baseline.

Table S19 Gamma-glutamyl Transpeptidase (µL)

| Subject Group                   | Subject ID | BL-1 | BL-2 | 1  | 2   | 3  | 4  | 5   | 6   | 7   | 8   |
|---------------------------------|------------|------|------|----|-----|----|----|-----|-----|-----|-----|
| Non-infected Control            | NHP C1     | 71   | 65   |    |     |    |    |     |     |     |     |
|                                 | NHP C2     | 74   | 63   |    |     |    |    |     |     |     |     |
|                                 | NHP C3     | 122  | 133  |    |     |    |    |     |     |     |     |
| Terminal: No Manipulations      | NHP1       | 46   | 45   |    |     |    |    |     | 78  |     |     |
|                                 | NHP2       | 38   | 40   |    |     |    |    |     |     | 379 |     |
|                                 | NHP3       | 49   | 52   |    |     |    |    |     |     |     | 140 |
|                                 | NHP4       | 93   | 76   |    |     |    |    |     |     | 309 |     |
|                                 | NHP5       | 73   | 71   |    |     |    |    | 270 |     |     |     |
|                                 | NHP6       | 46   | 44   |    |     |    |    |     |     |     | 195 |
| Terminal: Routine Manipulations | NHP7       | 37   | 36   |    |     | 46 |    | 207 |     | 266 |     |
|                                 | NHP8       | 65   | 59   |    |     | 71 |    | 89  | 259 |     |     |
|                                 | NHP9       | 78   | 65   |    |     | 61 |    | 57  |     |     | 237 |
|                                 | NHP10      | 48   | 46   |    |     | 52 |    | 49  |     | 155 |     |
|                                 | NHP11      | 95   | 90   |    |     | 95 |    | 83  | 194 |     |     |
|                                 | NHP12      | 68   | 59   |    |     | 69 |    | 76  |     |     | 315 |
| Necropsy Day 3                  | NHP13      | 100  | 90   | 89 |     | 77 |    |     |     |     |     |
|                                 | NHP14      | 61   | 63   | 65 |     | 61 |    |     |     |     |     |
|                                 | NHP15      | 56   | 56   | 60 |     | 55 |    |     |     |     |     |
| Necropsy Day 5                  | NHP16      | 59   | 52   | 64 |     | 60 |    | 54  |     |     |     |
|                                 | NHP17      | 56   | 57   | 66 |     | 61 |    | 52  |     |     |     |
|                                 | NHP18      | 32   | 29   | 31 |     |    |    | 42  |     |     |     |
| Necropsy Day 4                  | NHP19      | 46   | 43   |    | 43  |    | 43 |     |     |     |     |
|                                 | NHP20      | 69   | 61   |    | 66  |    | 61 |     |     |     |     |
|                                 | NHP21      | 96   | 91   |    | 105 |    | 78 |     |     |     |     |
| Necropsy Day 6                  | NHP22      | 70   | 63   |    | 71  |    | 68 |     | 151 |     |     |
|                                 | NHP23      | 63   | 65   |    | 65  |    | 75 |     | 119 |     |     |
|                                 | NHP24      | 67   | 58   |    | 64  |    | 63 |     | 157 |     |     |

Abbreviations: BL, baseline.

Table S20 Globulin (g/dL)

| Subject Group                   | Subject ID | BL-1 | BL-2 | 1   | 2   | 3   | 4   | 5   | 6   | 7   | 8   |
|---------------------------------|------------|------|------|-----|-----|-----|-----|-----|-----|-----|-----|
| Non-infected Control            | NHP C1     | 3.5  | 3.1  |     |     |     |     |     |     |     |     |
|                                 | NHP C2     | 3.9  | 3.6  |     |     |     |     |     |     |     |     |
|                                 | NHP C3     | 3.2  | 3.1  |     |     |     |     |     |     |     |     |
| Terminal: No Manipulations      | NHP1       | 3.6  | 3.3  |     |     |     |     |     | 4   |     |     |
|                                 | NHP2       | 3.7  | 3.4  |     |     |     |     |     |     | 3.5 |     |
|                                 | NHP3       | 4.3  | 3.6  |     |     |     |     |     |     |     | 3.9 |
|                                 | NHP4       | 4.3  | 3.6  |     |     |     |     |     |     | 4.1 |     |
|                                 | NHP5       | 3.7  | 3    |     |     |     |     | 5.7 |     |     |     |
|                                 | NHP6       | 3.7  | 3.3  |     |     |     |     |     |     |     | 3.7 |
| Terminal: Routine Manipulations | NHP7       | 2.9  | 2.7  |     |     | 3.5 |     | 3.7 |     | 3.4 |     |
|                                 | NHP8       | 3.5  | 3.3  |     |     | 3.5 |     | 3.7 | 3.8 |     |     |
|                                 | NHP9       | 3.5  | 3    |     |     | 3.3 |     | 3.3 |     |     | 3.6 |
|                                 | NHP10      | 3.4  | 3.3  |     |     | 3.6 |     | 3.4 |     | 3.2 |     |
|                                 | NHP11      | 3.7  | 3.5  |     |     | 3.7 |     | 3.6 | 3.9 |     |     |
|                                 | NHP12      | 3.7  | 3.2  |     |     | 3.8 |     | 4   |     |     | 4.3 |
| Necropsy Day 3                  | NHP13      | 3.6  | 3.7  | 3.6 |     | 3.2 |     |     |     |     |     |
|                                 | NHP14      | 3.3  | 3.5  | 3.4 |     | 3.3 |     |     |     |     |     |
|                                 | NHP15      | 3.1  | 3.3  | 3.6 |     | 2.8 |     |     |     |     |     |
| Necropsy Day 5                  | NHP16      | 3.7  | 3.3  | 3.8 |     | 3.4 |     | 3.7 |     |     |     |
|                                 | NHP17      | 3.1  | 3.1  | 3.1 |     | 2.6 |     | 3   |     |     |     |
|                                 | NHP18      | 4    | 4.1  | 4.2 |     |     |     | 3.7 |     |     |     |
| Necropsy Day 4                  | NHP19      | 3.5  | 3.3  |     | 3.4 |     | 3.6 |     |     |     |     |
|                                 | NHP20      | 3.6  | 3.2  |     | 3.5 |     | 3.5 |     |     |     |     |
|                                 | NHP21      | 3.3  | 3.3  |     | 3.5 |     | 3.3 |     |     |     |     |
| Necropsy Day 6                  | NHP22      | 4.4  | 4.1  |     | 4.5 |     | 4.7 |     | 5   |     |     |
|                                 | NHP23      | 3.8  | 3.7  |     | 4   |     | 4.5 |     | 4.1 |     |     |
|                                 | NHP24      | 3.3  | 3.1  |     | 3.6 |     | 3.8 |     | 3.3 |     |     |

Abbreviations: BL, baseline.

Table S21 Glucose (mg/dL)

| Subject Group                   | Subject ID | BL-1 | BL-2 | 1   | 2  | 3   | 4  | 5  | 6  | 7   | 8  |
|---------------------------------|------------|------|------|-----|----|-----|----|----|----|-----|----|
| Non-infected Control            | NHP C1     | 63   | 63   |     |    |     |    |    |    |     |    |
|                                 | NHP C2     | 79   | 63   |     |    |     |    |    |    |     |    |
|                                 | NHP C3     | 70   | 70   |     |    |     |    |    |    |     |    |
| Terminal: No Manipulations      | NHP1       | 69   | 73   |     |    |     |    |    | 76 |     |    |
|                                 | NHP2       | 62   | 90   |     |    |     |    |    |    | 37  |    |
|                                 | NHP3       | 60   | 68   |     |    |     |    |    |    |     | 72 |
|                                 | NHP4       | 64   | 62   |     |    |     |    |    |    | 108 |    |
|                                 | NHP5       | 56   | 67   |     |    |     |    | 67 |    |     |    |
|                                 | NHP6       | 57   | 60   |     |    |     |    |    |    |     | 50 |
| Terminal: Routine Manipulations | NHP7       | 55   | 51   |     |    | 83  |    | 59 |    | 49  |    |
|                                 | NHP8       | 64   | 62   |     |    | 69  |    | 71 | 74 |     |    |
|                                 | NHP9       | 112  | 54   |     |    | 106 |    | 92 |    |     | 48 |
|                                 | NHP10      | 61   | 58   |     |    | 67  |    | 75 |    | 69  |    |
|                                 | NHP11      | 64   | 57   |     |    | 66  |    | 66 | 81 |     |    |
|                                 | NHP12      | 67   | 66   |     |    | 76  |    | 91 |    |     | 12 |
| Necropsy Day 3                  | NHP13      | 76   | 96   | 70  |    | 69  |    |    |    |     |    |
|                                 | NHP14      | 63   | 66   | 68  |    | 72  |    |    |    |     |    |
|                                 | NHP15      | 79   | 70   | 76  |    | 54  |    |    |    |     |    |
| Necropsy Day 5                  | NHP16      | 57   | 58   | 72  |    | 83  |    | 45 |    |     |    |
|                                 | NHP17      | 71   | 71   | 74  |    | 67  |    | 71 |    |     |    |
|                                 | NHP18      | 79   | 75   | 100 |    |     |    | 53 |    |     |    |
| Necropsy Day 4                  | NHP19      | 69   | 68   |     | 78 |     | 57 |    |    |     |    |
|                                 | NHP20      | 66   | 61   |     | 76 |     | 71 |    |    |     |    |
|                                 | NHP21      | 77   | 69   |     | 66 |     | 67 |    |    |     |    |
| Necropsy Day 6                  | NHP22      | 67   | 61   |     | 75 |     | 86 |    | 48 |     |    |
|                                 | NHP23      | 59   | 57   |     | 66 |     | 87 |    | 93 |     |    |
|                                 | NHP24      | 64   | 60   |     | 73 |     | 81 |    | 46 |     |    |

Abbreviations: BL, baseline.

Table S22 Total Bilirubin (mg/dL)

| Subject Group                   | Subject ID | BL-1 | BL-2 | 1   | 2   | 3   | 4   | 5   | 6   | 7   | 8   |
|---------------------------------|------------|------|------|-----|-----|-----|-----|-----|-----|-----|-----|
| Non-infected Control            | NHP C1     | 0.4  | 0.4  |     |     |     |     |     |     |     |     |
|                                 | NHP C2     | 0.3  | 0.3  |     |     |     |     |     |     |     |     |
|                                 | NHP C3     | 0.4  | 0.4  |     |     |     |     |     |     |     |     |
| Terminal: No Manipulations      | NHP1       | 0.4  | 0.4  |     |     |     |     |     | 0.7 |     |     |
|                                 | NHP2       | 0.4  | 0.4  |     |     |     |     |     |     | 4.8 |     |
|                                 | NHP3       | 0.5  | 0.4  |     |     |     |     |     |     |     | 0.6 |
|                                 | NHP4       | 0.5  | 0.4  |     |     |     |     |     |     | 1.8 |     |
|                                 | NHP5       | 0.5  | 0.4  |     |     |     |     | 0.5 |     |     |     |
|                                 | NHP6       | 0.4  | 0.4  |     |     |     |     |     |     |     | 0.8 |
| Terminal: Routine Manipulations | NHP7       | 0.4  | 0.4  |     |     | 0.4 |     | 0.6 |     | 2.8 |     |
|                                 | NHP8       | 0.3  | 0.4  |     |     | 0.4 |     | 0.5 | 0.9 |     |     |
|                                 | NHP9       | 0.4  | 0.5  |     |     | 0.4 |     | 0.4 |     |     | 1.3 |
|                                 | NHP10      | 0.4  | 0.5  |     |     | 0.4 |     | 0.6 |     | 1.1 |     |
|                                 | NHP11      | 0.4  | 0.4  |     |     | 0.4 |     | 0.5 | 1.5 |     |     |
|                                 | NHP12      | 0.4  | 0.5  |     |     | 0.4 |     | 0.5 |     |     | 2.5 |
| Necropsy Day 3                  | NHP13      | 0.4  | 0.4  | 0.5 |     | 0.4 |     |     |     |     |     |
|                                 | NHP14      | 0.4  | 0.4  | 0.4 |     | 0.4 |     |     |     |     |     |
|                                 | NHP15      | 0.5  | 0.4  | 0.4 |     | 0.4 |     |     |     |     |     |
| Necropsy Day 5                  | NHP16      | 0.5  | 0.4  | 0.5 |     | 0.5 |     | 0.5 |     |     |     |
|                                 | NHP17      | 0.5  | 0.4  | 0.4 |     | 0.5 |     | 0.5 |     |     |     |
|                                 | NHP18      | 0.3  | 0.3  | 0.4 |     |     |     | 0.5 |     |     |     |
| Necropsy Day 4                  | NHP19      | 0.4  | 0.6  |     | 0.5 |     | 0.5 |     |     |     |     |
|                                 | NHP20      | 0.4  | 0.4  |     | 0.4 |     | 0.4 |     |     |     |     |
|                                 | NHP21      | 0.5  | 0.4  |     | 0.4 |     | 0.5 |     |     |     |     |
| Necropsy Day 6                  | NHP22      | 0.4  | 0.5  |     | 0.5 |     | 0.8 |     | 0.7 |     |     |
|                                 | NHP23      | 0.4  | 0.5  |     | 0.4 |     | 0.5 |     | 0.4 |     |     |
|                                 | NHP24      | 0.6  | 0.5  |     | 0.5 |     | 0.7 |     | 0.9 |     |     |

Abbreviations: BL, baseline.

Table S23 Total Protein (g/dL)

| Subject Group                   | Subject ID | BL-1 | BL-2 | 1   | 2   | 3   | 4   | 5   | 6   | 7   | 8   |
|---------------------------------|------------|------|------|-----|-----|-----|-----|-----|-----|-----|-----|
| Non-infected Control            | NHP C1     | 6.8  | 6.7  |     |     |     |     |     |     |     |     |
|                                 | NHP C2     | 7.5  | 6.8  |     |     |     |     |     |     |     |     |
|                                 | NHP C3     | 6.9  | 6.5  |     |     |     |     |     |     |     |     |
| Terminal: No Manipulations      | NHP1       | 6.8  | 6.7  |     |     |     |     |     | 6   |     |     |
|                                 | NHP2       | 7.7  | 7.3  |     |     |     |     |     |     | 5.4 |     |
|                                 | NHP3       | 7.7  | 6.8  |     |     |     |     |     |     |     | 6   |
|                                 | NHP4       | 8.2  | 7.2  |     |     |     |     |     |     | 6.2 |     |
|                                 | NHP5       | 7.8  | 6.9  |     |     |     |     | 8.1 |     |     |     |
|                                 | NHP6       | 7.1  | 6.6  |     |     |     |     |     |     |     | 5.9 |
| Terminal: Routine Manipulations | NHP7       | 5.6  | 5.4  |     |     | 6.1 |     | 5.7 |     | 5   |     |
|                                 | NHP8       | 6.7  | 6.7  |     |     | 7   |     | 6.7 | 6.6 |     |     |
|                                 | NHP9       | 7    | 6.5  |     |     | 6.7 |     | 6   |     |     | 5.8 |
|                                 | NHP10      | 6.9  | 6.7  |     |     | 6.9 |     | 6.1 |     | 5.2 |     |
|                                 | NHP11      | 6.4  | 6.2  |     |     | 6.1 |     | 5.5 | 5.8 |     |     |
|                                 | NHP12      | 7.6  | 6.9  |     |     | 7.1 |     | 7   |     |     | 6.6 |
| Necropsy Day 3                  | NHP13      | 7.1  | 7.2  | 6.9 |     | 6.3 |     |     |     |     |     |
|                                 | NHP14      | 6.7  | 6.7  | 6.6 |     | 6.8 |     |     |     |     |     |
|                                 | NHP15      | 6.6  | 6.5  | 7   |     | 6.6 |     |     |     |     |     |
| Necropsy Day 5                  | NHP16      | 7.1  | 6.5  | 7.3 |     | 7   |     | 6.5 |     |     |     |
|                                 | NHP17      | 6.8  | 6.6  | 6.6 |     | 6.3 |     | 5.9 |     |     |     |
|                                 | NHP18      | 7.6  | 7.7  | 7.9 |     |     |     | 6.6 |     |     |     |
| Necropsy Day 4                  | NHP19      | 7.1  | 6.7  |     | 6.7 |     | 6.8 |     |     |     |     |
|                                 | NHP20      | 7.2  | 6.5  |     | 6.6 |     | 6.8 |     |     |     |     |
|                                 | NHP21      | 7.4  | 7.2  |     | 7.3 |     | 6.5 |     |     |     |     |
| Necropsy Day 6                  | NHP22      | 7.8  | 7.4  |     | 7.7 |     | 8   |     | 7.3 |     |     |
|                                 | NHP23      | 7.5  | 7.5  |     | 7.6 |     | 8   |     | 7   |     |     |
|                                 | NHP24      | 7    | 6.6  |     | 7.1 |     | 7.7 |     | 6   |     |     |

Abbreviations: BL, baseline.



Table S24 Basophil Count (10<sup>3</sup> cells/μL)

| Subject Group                   | Subject ID | BL-1 | BL-2 | 1    | 2    | 3    | 4    | 5    | 6    | 7    | 8    |
|---------------------------------|------------|------|------|------|------|------|------|------|------|------|------|
| Non-infected Control            | NHP C1     | 0.01 | 0.02 |      |      |      |      |      |      |      |      |
|                                 | NHP C2     | 0.02 | 0.01 |      |      |      |      |      |      |      |      |
|                                 | NHP C3     | 0.01 | 0    |      |      |      |      |      |      |      |      |
| Terminal: No Manipulations      | NHP1       | 0.01 | 0.01 |      |      |      |      |      | 0.02 |      |      |
|                                 | NHP2       | 0.01 | 0.01 |      |      |      |      |      |      | 0.01 |      |
|                                 | NHP3       | 0.02 | 0.01 |      |      |      |      |      |      |      | 0    |
|                                 | NHP4       | 0.01 | 0.01 |      |      |      |      |      |      | 0.09 |      |
|                                 | NHP5       | 0.02 | 0.01 |      |      |      |      | 0.03 |      |      |      |
|                                 | NHP6       | 0.01 | 0    |      |      |      |      |      |      |      | 0.04 |
| Terminal: Routine Manipulations | NHP7       | 0.02 | 0.01 |      |      | 0.01 |      | 0.01 |      | 0    |      |
|                                 | NHP8       | 0.01 | 0.02 |      |      | 0.02 |      | 0.01 | 0.01 |      |      |
|                                 | NHP9       | 0.01 | 0.01 |      |      | 0.02 |      | 0    |      |      | 0.07 |
|                                 | NHP10      | 0    | 0    |      |      | 0.01 |      | 0    |      | 0.02 |      |
|                                 | NHP11      | 0.01 | 0.01 |      |      | 0.01 |      | 0.01 | 0    |      |      |
|                                 | NHP12      | 0.01 | 0.01 |      |      | 0.02 |      | 0.01 |      |      | 0.47 |
| Necropsy Day 3                  | NHP13      | 0.01 | 0.01 | 0.03 |      | 0.01 |      |      |      |      |      |
|                                 | NHP14      | 0.01 | 0.01 | 0.01 |      | 0.01 |      |      |      |      |      |
|                                 | NHP15      | 0.03 | 0.03 | 0.04 |      | 0.02 |      |      |      |      |      |
| Necropsy Day 5                  | NHP16      | 0.02 | 0.05 | 0.06 |      | 0.02 |      | 0.03 |      |      |      |
|                                 | NHP17      | 0    | 0.01 | 0.02 |      | 0.01 |      | 0.02 |      |      |      |
|                                 | NHP18      | 0    | 0.01 | 0.02 |      |      |      | 0.02 |      |      |      |
| Necropsy Day 4                  | NHP19      | 0.03 | 0.01 |      | 0.05 |      | 0.04 |      |      |      |      |
|                                 | NHP20      | 0.02 | 0.01 |      | 0.01 |      | 0.01 |      |      |      |      |
|                                 | NHP21      | 0.01 | 0.04 |      | 0.03 |      | 0.03 |      |      |      |      |
| Necropsy Day 6                  | NHP22      | 0.02 | 0.02 |      | 0.03 |      | 0.01 |      | 0.01 |      |      |
|                                 | NHP23      | 0.02 | 0.01 |      | 0    |      | 0    |      | 0    |      |      |
|                                 | NHP24      | 0.01 | 0.01 |      | 0.02 |      | 0.01 |      | 0.01 |      |      |

Abbreviations: BL, baseline.

Table S25 Eosinophil Count (10<sup>3</sup> cells/μL)

| Subject Group                   | Subject ID | BL-1 | BL-2 | 1    | 2    | 3    | 4 | 5    | 6    | 7    | 8    |
|---------------------------------|------------|------|------|------|------|------|---|------|------|------|------|
| Non-infected Control            | NHP C1     | 0.06 | 0.04 |      |      |      |   |      |      |      |      |
|                                 | NHP C2     | 0    | 0    |      |      |      |   |      |      |      |      |
|                                 | NHP C3     | 0.06 | 0.05 |      |      |      |   |      |      |      |      |
| Terminal: No Manipulations      | NHP1       | 0    | 0.05 |      |      |      |   |      | 0    |      |      |
|                                 | NHP2       | 0    | 0.04 |      |      |      |   |      |      | 0    |      |
|                                 | NHP3       | 0.05 | 0.04 |      |      |      |   |      |      |      | 0.01 |
|                                 | NHP4       | 0.07 | 0.1  |      |      |      |   |      |      | 0.02 |      |
|                                 | NHP5       | 0.04 | 0.02 |      |      |      |   | 0.05 |      |      |      |
|                                 | NHP6       | 0.1  | 0.1  |      |      |      |   |      |      |      | 0.03 |
| Terminal: Routine Manipulations | NHP7       | 0.02 | 0    |      |      | 0.01 |   | 0.01 |      | 0.02 |      |
|                                 | NHP8       | 0.21 | 0.03 |      |      | 0.11 |   | 0.02 | 0.02 |      |      |
|                                 | NHP9       | 0.15 | 0    |      |      | 0.02 |   | 0.05 |      |      | 0.01 |
|                                 | NHP10      | 0.09 | 0.06 |      |      | 0.03 |   | 0.01 |      | 0    |      |
|                                 | NHP11      | 0.13 | 0.05 |      |      | 0.01 |   | 0.01 | 0.02 |      |      |
|                                 | NHP12      | 0.05 | 0    |      |      | 0.01 |   | 0    |      |      | 0.04 |
| Necropsy Day 3                  | NHP13      | 0.25 | 0    | 0.12 |      | 0.02 |   |      |      |      |      |
|                                 | NHP14      | 0.07 | 0.19 | 0.15 |      | 0.25 |   |      |      |      |      |
|                                 | NHP15      | 0.04 | 0.15 | 0.04 |      | 0    |   |      |      |      |      |
| Necropsy Day 5                  | NHP16      | 0.23 | 0.84 | 0.17 |      | 0.02 |   | 0.01 |      |      |      |
|                                 | NHP17      | 0.02 | 0    | 0    |      | 0    |   | 0    |      |      |      |
|                                 | NHP18      | 0.02 | 0.01 | 0.02 |      |      |   | 0.02 |      |      |      |
| Necropsy Day 4                  | NHP19      | 0.07 | 0.02 |      | 0.01 |      | 0 |      |      |      |      |
|                                 | NHP20      | 0.19 | 0.06 |      | 0.03 |      | 0 |      |      |      |      |
|                                 | NHP21      | 0.07 | 0.03 |      | 0.02 |      | 0 |      |      |      |      |
| Necropsy Day 6                  | NHP22      | 0.03 | 0.01 |      | 0.01 |      | 0 |      | 0.01 |      |      |
|                                 | NHP23      | 0.03 | 0.03 |      | 0    |      | 0 |      | 0.04 |      |      |
|                                 | NHP24      | 0.02 | 0.01 |      | 0    |      | 0 |      | 0    |      |      |

Abbreviations: BL, baseline.

Table S26 Hemoglobin (g/dL)

| Subject Group                   | Subject ID | BL-1 | BL-2 | 1    | 2    | 3    | 4    | 5    | 6    | 7    | 8    |
|---------------------------------|------------|------|------|------|------|------|------|------|------|------|------|
| Non-infected Control            | NHP C1     | 10.8 | 10   |      |      |      |      |      |      |      |      |
|                                 | NHP C2     | 11.4 | 10.4 |      |      |      |      |      |      |      |      |
|                                 | NHP C3     | 11.1 | 10.2 |      |      |      |      |      |      |      |      |
| Terminal: No Manipulations      | NHP1       | 12.6 | 12.2 |      |      |      |      |      | 11.3 |      |      |
|                                 | NHP2       | 12.4 | 12   |      |      |      |      |      |      | 11.6 |      |
|                                 | NHP3       | 12.5 | 12   |      |      |      |      |      |      |      | 12   |
|                                 | NHP4       | 13.3 | 12.6 |      |      |      |      |      |      | 13.3 |      |
|                                 | NHP5       | 13.4 | 13.4 |      |      |      |      | 10.8 |      |      |      |
|                                 | NHP6       | 13.2 | 12.1 |      |      |      |      |      |      |      | 11   |
| Terminal: Routine Manipulations | NHP7       | 10.9 | 8.9  |      |      | 11.7 |      | 9.8  |      | 8.7  |      |
|                                 | NHP8       | 10.6 | 10.4 |      |      | 11.2 |      | 10.1 | 10.6 |      |      |
|                                 | NHP9       | 12.6 | 11.1 |      |      | 12   |      | 10.6 |      |      | 12.1 |
|                                 | NHP10      | 9.9  | 9.3  |      |      | 9.7  |      | 9    |      | 9.7  |      |
|                                 | NHP11      | 12.6 | 12.1 |      |      | 12.2 |      | 10.3 | 12.9 |      |      |
|                                 | NHP12      | 12.8 | 11.4 |      |      | 12.2 |      | 10.6 |      |      | 11.9 |
| Necropsy Day 3                  | NHP13      | 11.6 | 11.6 | 11.3 |      | 10.8 |      |      |      |      |      |
|                                 | NHP14      | 11.3 | 11.3 | 11.8 |      | 12.2 |      |      |      |      |      |
|                                 | NHP15      | 11.3 | 10.5 | 11.5 |      | 10.6 |      |      |      |      |      |
| Necropsy Day 5                  | NHP16      | 11.5 | 11.1 | 12.2 |      | 11.1 |      | 10.3 |      |      |      |
|                                 | NHP17      | 11.5 | 11.2 | 11.7 |      | 11.1 |      | 10.8 |      |      |      |
|                                 | NHP18      | 12.2 | 12.2 | 12   |      |      |      | 10.5 |      |      |      |
| Necropsy Day 4                  | NHP19      | 12.2 | 10.7 |      | 11   |      | 10.9 |      |      |      |      |
|                                 | NHP20      | 12.9 | 12   |      | 12.3 |      | 12.4 |      |      |      |      |
|                                 | NHP21      | 12.5 | 11.8 |      | 12.4 |      | 12.6 |      |      |      |      |
| Necropsy Day 6                  | NHP22      | 10.8 | 9.7  |      | 11.7 |      | 9.7  |      | 9.9  |      |      |
|                                 | NHP23      | 13   | 11.8 |      | 12.5 |      | 12.3 |      | 11.7 |      |      |
|                                 | NHP24      | 11   | 9.9  |      | 10.7 |      | 11.1 |      | 10.1 |      |      |

Abbreviations: BL, baseline.

**Table S27 Hematocrit (%)**

| Subject Group                   | Subject ID | BL-1 | BL-2 | 1    | 2    | 3    | 4    | 5    | 6    | 7    | 8    |
|---------------------------------|------------|------|------|------|------|------|------|------|------|------|------|
| Non-infected Control            | NHP C1     | 33.6 | 31.3 |      |      |      |      |      |      |      |      |
|                                 | NHP C2     | 36.8 | 33.9 |      |      |      |      |      |      |      |      |
|                                 | NHP C3     | 34.1 | 31.8 |      |      |      |      |      |      |      |      |
| Terminal: No Manipulations      | NHP1       | 40.4 | 39.3 |      |      |      |      |      | 35.5 |      |      |
|                                 | NHP2       | 38.7 | 37.6 |      |      |      |      |      |      | 35.1 |      |
|                                 | NHP3       | 39.8 | 37.4 |      |      |      |      |      |      |      | 35.6 |
|                                 | NHP4       | 41.1 | 39   |      |      |      |      |      |      | 40.5 |      |
|                                 | NHP5       | 42.5 | 42   |      |      |      |      | 31.6 |      |      |      |
|                                 | NHP6       | 41.7 | 37.4 |      |      |      |      |      |      |      | 34.5 |
| Terminal: Routine Manipulations | NHP7       | 32.2 | 27.5 |      |      | 35.8 |      | 29.9 |      | 26.1 |      |
|                                 | NHP8       | 32.9 | 32.6 |      |      | 35   |      | 30.5 | 31.3 |      |      |
|                                 | NHP9       | 37.3 | 34.1 |      |      | 36.8 |      | 32   |      |      | 35.4 |
|                                 | NHP10      | 32.2 | 29.4 |      |      | 31.6 |      | 28.8 |      | 29.7 |      |
|                                 | NHP11      | 38.5 | 37.2 |      |      | 37.4 |      | 31   | 39.6 |      |      |
|                                 | NHP12      | 38.6 | 34.3 |      |      | 37.2 |      | 32.2 |      |      | 37.6 |
| Necropsy Day 3                  | NHP13      | 36.9 | 36.3 | 35.1 |      | 33.6 |      |      |      |      |      |
|                                 | NHP14      | 34.3 | 34.5 | 35.2 |      | 36.6 |      |      |      |      |      |
|                                 | NHP15      | 35.6 | 33   | 36.8 |      | 32.7 |      |      |      |      |      |
| Necropsy Day 5                  | NHP16      | 36.8 | 35.7 | 38.4 |      | 34.9 |      | 31.9 |      |      |      |
|                                 | NHP17      | 36.4 | 35.5 | 36.5 |      | 34.5 |      | 33.5 |      |      |      |
|                                 | NHP18      | 38.6 | 38.3 | 37.5 |      |      |      | 31.8 |      |      |      |
| Necropsy Day 4                  | NHP19      | 37.2 | 32.9 |      | 33.8 |      | 33.6 |      |      |      |      |
|                                 | NHP20      | 39.2 | 36.6 |      | 37.6 |      | 37.2 |      |      |      |      |
|                                 | NHP21      | 38.6 | 37.2 |      | 38.7 |      | 38.1 |      |      |      |      |
| Necropsy Day 6                  | NHP22      | 33.5 | 30.5 |      | 35.3 |      | 30.3 |      | 29.9 |      |      |
|                                 | NHP23      | 40.4 | 37.1 |      | 39.0 |      | 38   |      | 35.6 |      |      |
|                                 | NHP24      | 33.5 | 30.5 |      | 32.4 |      | 33.7 |      | 29.6 |      |      |

Abbreviations: BL, baseline.

Table S28 Lymphocyte Counts (10<sup>3</sup> cells/μL)

| Subject Group                   | Subject ID | BL-1 | BL-2 | 1    | 2    | 3    | 4    | 5    | 6    | 7    | 8    |
|---------------------------------|------------|------|------|------|------|------|------|------|------|------|------|
| Non-infected Control            | NHP C1     | 2.87 | 2.94 |      |      |      |      |      |      |      |      |
|                                 | NHP C2     | 1.93 | 2.51 |      |      |      |      |      |      |      |      |
|                                 | NHP C3     | 2.82 | 3.17 |      |      |      |      |      |      |      |      |
| Terminal: No Manipulations      | NHP1       | 1.93 | 2.35 |      |      |      |      |      | 1.96 |      |      |
|                                 | NHP2       | 2.81 | 2.98 |      |      |      |      |      |      | 2.41 |      |
|                                 | NHP3       | 4.27 | 3.51 |      |      |      |      |      |      |      | 1.46 |
|                                 | NHP4       | 2.3  | 2.24 |      |      |      |      |      |      | 1.65 |      |
|                                 | NHP5       | 1.98 | 1.99 |      |      |      |      | 5.49 |      |      |      |
|                                 | NHP6       | 2.25 | 2.99 |      |      |      |      |      |      |      | 1.6  |
| Terminal: Routine Manipulations | NHP7       | 1.17 | 2.02 |      |      | 1.4  |      | 1.97 |      | 2.8  |      |
|                                 | NHP8       | 3.55 | 3.75 |      |      | 3.15 |      | 1.62 | 2.18 |      |      |
|                                 | NHP9       | 2.23 | 2.77 |      |      | 2.15 |      | 1.49 |      |      | 1.43 |
|                                 | NHP10      | 2.05 | 2.27 |      |      | 1.83 |      | 1.13 |      | 1.4  |      |
|                                 | NHP11      | 3.63 | 3.41 |      |      | 2.26 |      | 1.51 | 1.08 |      |      |
|                                 | NHP12      | 1.72 | 1.32 |      |      | 1.42 |      | 0.73 |      |      | 3.93 |
| Necropsy Day 3                  | NHP13      | 2.52 | 2.98 | 2.04 |      | 1.2  |      |      |      |      |      |
|                                 | NHP14      | 1.82 | 2.4  | 2.14 |      | 1.3  |      |      |      |      |      |
|                                 | NHP15      | 2.03 | 2.21 | 2.38 |      | 1.35 |      |      |      |      |      |
| Necropsy Day 5                  | NHP16      | 2.07 | 2.39 | 2.77 |      | 1.62 |      | 0.96 |      |      |      |
|                                 | NHP17      | 0.76 | 1.1  | 1.28 |      | 1.02 |      | 1.76 |      |      |      |
|                                 | NHP18      | 1.72 | 2.17 | 1.71 |      |      |      | 1.04 |      |      |      |
| Necropsy Day 4                  | NHP19      | 6.05 | 4.67 |      | 5.27 |      | 1.4  |      |      |      |      |
|                                 | NHP20      | 3.11 | 1.99 |      | 2.08 |      | 1.46 |      |      |      |      |
|                                 | NHP21      | 2.5  | 1.82 |      | 2.41 |      | 1.23 |      |      |      |      |
| Necropsy Day 6                  | NHP22      | 4.91 | 3.17 |      | 2.69 |      | 1.6  |      | 1.23 |      |      |
|                                 | NHP23      | 2.4  | 2.12 |      | 2.2  |      | 1.17 |      | 1.15 |      |      |
|                                 | NHP24      | 2.66 | 1.93 |      | 2.69 |      | 1.07 |      | 1.81 |      |      |

Abbreviations: BL, baseline.

**Table S29 Mean Corpuscular Hemoglobin (pico)**

| Subject Group                   | Subject ID | BL-1 | BL-2 | 1    | 2    | 3    | 4    | 5    | 6    | 7    | 8    |
|---------------------------------|------------|------|------|------|------|------|------|------|------|------|------|
| Non-infected Control            | NHP C1     | 21.2 | 21.6 |      |      |      |      |      |      |      |      |
|                                 | NHP C2     | 24.2 | 24.4 |      |      |      |      |      |      |      |      |
|                                 | NHP C3     | 22.3 | 22.1 |      |      |      |      |      |      |      |      |
| Terminal: No Manipulations      | NHP1       | 22   | 21.9 |      |      |      |      |      | 22.5 |      |      |
|                                 | NHP2       | 21.6 | 21.7 |      |      |      |      |      |      | 21.9 |      |
|                                 | NHP3       | 24.9 | 24.8 |      |      |      |      |      |      |      | 25   |
|                                 | NHP4       | 26   | 26.1 |      |      |      |      |      |      | 26   |      |
|                                 | NHP5       | 23.9 | 24.3 |      |      |      |      | 24.6 |      |      |      |
|                                 | NHP6       | 23.8 | 23.8 |      |      |      |      |      |      |      | 23.5 |
| Terminal: Routine Manipulations | NHP7       | 26.8 | 26.3 |      |      | 26.1 |      | 26.2 |      | 27.1 |      |
|                                 | NHP8       | 22.7 | 22.5 |      |      | 22.4 |      | 22.5 | 22.4 |      |      |
|                                 | NHP9       | 26   | 25.3 |      |      | 24.9 |      | 25   |      |      | 24.7 |
|                                 | NHP10      | 23.9 | 24.3 |      |      | 24.2 |      | 23.9 |      | 23.9 |      |
|                                 | NHP11      | 23.2 | 23.2 |      |      | 23.1 |      | 23.6 | 23   |      |      |
|                                 | NHP12      | 24.9 | 25.2 |      |      | 24.8 |      | 25   |      |      | 24.6 |
| Necropsy Day 3                  | NHP13      | 24.4 | 24.5 | 25   |      | 24.6 |      |      |      |      |      |
|                                 | NHP14      | 26.2 | 26.5 | 27.1 |      | 26.6 |      |      |      |      |      |
|                                 | NHP15      | 25.4 | 25.9 | 25.5 |      | 26.2 |      |      |      |      |      |
| Necropsy Day 5                  | NHP16      | 24.1 | 24.1 | 24.4 |      | 24.3 |      | 24.4 |      |      |      |
|                                 | NHP17      | 25.1 | 25.1 | 25.3 |      | 25.3 |      | 25.3 |      |      |      |
|                                 | NHP18      | 23.6 | 23.6 | 24   |      |      |      | 24.3 |      |      |      |
| Necropsy Day 4                  | NHP19      | 25.5 | 26   |      | 25.9 |      | 25.9 |      |      |      |      |
|                                 | NHP20      | 23.5 | 23.7 |      | 23.6 |      | 23.8 |      |      |      |      |
|                                 | NHP21      | 24.9 | 24.9 |      | 25   |      | 25.5 |      |      |      |      |
| Necropsy Day 6                  | NHP22      | 25.1 | 25.3 |      | 25.9 |      | 25.2 |      | 24.9 |      |      |
|                                 | NHP23      | 22.4 | 22.4 |      | 22.3 |      | 22.5 |      | 22.4 |      |      |
|                                 | NHP24      | 25.2 | 25.3 |      | 25.5 |      | 25.3 |      | 25.7 |      |      |

Abbreviations: BL, baseline.

**Table S30 Mean Corpuscular Hemoglobin Concentration (g/dL)**

| Subject Group                   | Subject ID | BL-1 | BL-2 | 1    | 2    | 3    | 4    | 5    | 6    | 7    | 8    |
|---------------------------------|------------|------|------|------|------|------|------|------|------|------|------|
| Non-infected Control            | NHP C1     | 32.1 | 31.9 |      |      |      |      |      |      |      |      |
|                                 | NHP C2     | 31   | 30.7 |      |      |      |      |      |      |      |      |
|                                 | NHP C3     | 32.6 | 32.1 |      |      |      |      |      |      |      |      |
| Terminal: No Manipulations      | NHP1       | 31.2 | 31   |      |      |      |      |      | 31.8 |      |      |
|                                 | NHP2       | 32   | 31.9 |      |      |      |      |      |      | 33   |      |
|                                 | NHP3       | 31.4 | 32.1 |      |      |      |      |      |      |      | 33.7 |
|                                 | NHP4       | 32.4 | 32.3 |      |      |      |      |      |      | 32.8 |      |
|                                 | NHP5       | 31.5 | 31.9 |      |      |      |      | 34.2 |      |      |      |
|                                 | NHP6       | 31.7 | 32.4 |      |      |      |      |      |      |      | 31.9 |
| Terminal: Routine Manipulations | NHP7       | 33.9 | 32.4 |      |      | 32.7 |      | 32.8 |      | 33.3 |      |
|                                 | NHP8       | 32.2 | 31.9 |      |      | 32   |      | 33.1 | 33.9 |      |      |
|                                 | NHP9       | 33.8 | 32.6 |      |      | 32.6 |      | 33.1 |      |      | 34.2 |
|                                 | NHP10      | 30.7 | 31.6 |      |      | 30.7 |      | 31.3 |      | 32.7 |      |
|                                 | NHP11      | 32.7 | 32.5 |      |      | 32.6 |      | 33.2 | 32.6 |      |      |
|                                 | NHP12      | 33.2 | 33.2 |      |      | 32.8 |      | 32.9 |      |      | 31.6 |
| Necropsy Day 3                  | NHP13      | 31.4 | 32   | 32.2 |      | 32.1 |      |      |      |      |      |
|                                 | NHP14      | 32.9 | 32.8 | 33.5 |      | 33.3 |      |      |      |      |      |
|                                 | NHP15      | 31.7 | 31.8 | 31.3 |      | 32.4 |      |      |      |      |      |
| Necropsy Day 5                  | NHP16      | 31.3 | 31.1 | 31.8 |      | 31.8 |      | 32.3 |      |      |      |
|                                 | NHP17      | 31.6 | 31.5 | 32.1 |      | 32.2 |      | 32.2 |      |      |      |
|                                 | NHP18      | 31.6 | 31.9 | 32   |      |      |      | 33   |      |      |      |
| Necropsy Day 4                  | NHP19      | 32.8 | 32.5 |      | 32.5 |      | 32.4 |      |      |      |      |
|                                 | NHP20      | 32.9 | 32.8 |      | 32.7 |      | 33.3 |      |      |      |      |
|                                 | NHP21      | 32.4 | 31.7 |      | 32   |      | 33.1 |      |      |      |      |
| Necropsy Day 6                  | NHP22      | 32.2 | 31.8 |      | 33.1 |      | 32   |      | 33.1 |      |      |
|                                 | NHP23      | 32.2 | 31.8 |      | 32.1 |      | 32.4 |      | 32.9 |      |      |
|                                 | NHP24      | 32.8 | 32.5 |      | 33   |      | 32.9 |      | 34.1 |      |      |

Abbreviations: BL, baseline.

**Table S31 Mean Corpuscular Volume (femto)**

| Subject Group                   | Subject ID | BL-1 | BL-2 | 1    | 2    | 3    | 4    | 5    | 6    | 7    | 8    |
|---------------------------------|------------|------|------|------|------|------|------|------|------|------|------|
| Non-infected Control            | NHP C1     | 66   | 67.5 |      |      |      |      |      |      |      |      |
|                                 | NHP C2     | 78.1 | 79.6 |      |      |      |      |      |      |      |      |
|                                 | NHP C3     | 68.6 | 69   |      |      |      |      |      |      |      |      |
| Terminal: No Manipulations      | NHP1       | 70.4 | 70.6 |      |      |      |      | 70.7 |      |      |      |
|                                 | NHP2       | 67.3 | 67.9 |      |      |      |      |      |      | 66.2 |      |
|                                 | NHP3       | 79.3 | 77.3 |      |      |      |      |      |      |      | 74.2 |
|                                 | NHP4       | 80.4 | 80.7 |      |      |      |      |      |      | 79.3 |      |
|                                 | NHP5       | 75.9 | 76.2 |      |      |      |      | 72   |      |      |      |
|                                 | NHP6       | 75.3 | 73.6 |      |      |      |      |      |      |      | 73.6 |
| Terminal: Routine Manipulations | NHP7       | 79.3 | 81.4 |      |      | 79.9 |      | 79.9 |      | 81.3 |      |
|                                 | NHP8       | 70.4 | 70.6 |      |      | 70.1 |      | 67.9 | 66   |      |      |
|                                 | NHP9       | 76.9 | 77.9 |      |      | 76.3 |      | 75.5 |      |      | 72.4 |
|                                 | NHP10      | 77.8 | 77   |      |      | 78.8 |      | 76.4 |      | 73.2 |      |
|                                 | NHP11      | 71   | 71.3 |      |      | 71   |      | 71.1 | 70.7 |      |      |
|                                 | NHP12      | 75.1 | 75.9 |      |      | 75.8 |      | 75.9 |      |      | 77.7 |
| Necropsy Day 3                  | NHP13      | 77.7 | 76.7 | 77.7 |      | 76.5 |      |      |      |      |      |
|                                 | NHP14      | 79.6 | 80.8 | 80.9 |      | 79.9 |      |      |      |      |      |
|                                 | NHP15      | 80   | 81.3 | 81.6 |      | 80.9 |      |      |      |      |      |
| Necropsy Day 5                  | NHP16      | 77.1 | 77.6 | 76.6 |      | 76.4 |      | 75.6 |      |      |      |
|                                 | NHP17      | 79.5 | 79.6 | 78.8 |      | 78.6 |      | 78.5 |      |      |      |
|                                 | NHP18      | 74.7 | 74.1 | 75   |      |      |      | 73.6 |      |      |      |
| Necropsy Day 4                  | NHP19      | 77.7 | 79.9 |      | 79.5 |      | 79.8 |      |      |      |      |
|                                 | NHP20      | 71.4 | 72.3 |      | 72   |      | 71.4 |      |      |      |      |
|                                 | NHP21      | 76.7 | 78.5 |      | 78   |      | 77   |      |      |      |      |
| Necropsy Day 6                  | NHP22      | 77.9 | 79.6 |      | 78.3 |      | 78.7 |      | 75.3 |      |      |
|                                 | NHP23      | 69.5 | 70.4 |      | 69.6 |      | 69.5 |      | 68.1 |      |      |
|                                 | NHP24      | 76.7 | 78   |      | 77.1 |      | 76.9 |      | 75.3 |      |      |

Abbreviations: BL, baseline.



**Table S32 Mean Platelet Volume (femto)**

| Subject Group                   | Subject ID | BL-1 | BL-2 | 1    | 2    | 3    | 4    | 5    | 6    | 7    | 8    |
|---------------------------------|------------|------|------|------|------|------|------|------|------|------|------|
| Non-infected Control            | NHP C1     | 11.1 | 10.3 |      |      |      |      |      |      |      |      |
|                                 | NHP C2     | 11.6 | 11.2 |      |      |      |      |      |      |      |      |
|                                 | NHP C3     | 9.5  | 9.3  |      |      |      |      |      |      |      |      |
| Terminal: No Manipulations      | NHP1       | 11.7 | 11.9 |      |      |      |      |      | 10.4 |      |      |
|                                 | NHP2       | 11.3 | 11.1 |      |      |      |      |      |      | 0    |      |
|                                 | NHP3       | 11.5 | 11.2 |      |      |      |      |      |      |      | 10.6 |
|                                 | NHP4       | 12.2 | 11.5 |      |      |      |      |      |      | 0    |      |
|                                 | NHP5       | 11.1 | 10.7 |      |      |      |      | 0    |      |      |      |
|                                 | NHP6       | 10.8 | 8.5  |      |      |      |      |      |      |      | 9.7  |
| Terminal: Routine Manipulations | NHP7       | 10.2 | 10.8 |      |      | 10.9 |      | 11   |      | 9.4  |      |
|                                 | NHP8       | 10.5 | 9.8  |      |      | 10.2 |      | 10.4 | 10.2 |      |      |
|                                 | NHP9       | 11.5 | 10.9 |      |      | 11.2 |      | 11.5 |      |      | 10.1 |
|                                 | NHP10      | 10.8 | 10.3 |      |      | 10.9 |      | 10.9 |      | 10.2 |      |
|                                 | NHP11      | 11.1 | 10.3 |      |      | 10.5 |      | 11.2 | 10   |      |      |
|                                 | NHP12      | 10.8 | 10.1 |      |      | 10.6 |      | 10.8 |      |      | 0    |
| Necropsy Day 3                  | NHP13      | 10.7 | 10.4 | 10.2 |      | 10.2 |      |      |      |      |      |
|                                 | NHP14      | 11.5 | 11   | 11.2 |      | 12.4 |      |      |      |      |      |
|                                 | NHP15      | 12.2 | 11.3 | 11.7 |      | 11.9 |      |      |      |      |      |
| Necropsy Day 5                  | NHP16      | 9.9  | 9.2  | 9.7  |      | 9.8  |      | 10.1 |      |      |      |
|                                 | NHP17      | 10.2 | 9.7  | 9.9  |      | 9.9  |      | 10   |      |      |      |
|                                 | NHP18      | 11.4 | 11.1 | 11.2 |      |      |      | 10.7 |      |      |      |
| Necropsy Day 4                  | NHP19      | 11.4 | 10.8 |      | 11   |      | 11.7 |      |      |      |      |
|                                 | NHP20      | 9.6  | 8.6  |      | 9.1  |      | 9.8  |      |      |      |      |
|                                 | NHP21      | 10   | 9.5  |      | 9.6  |      | 10.4 |      |      |      |      |
| Necropsy Day 6                  | NHP22      | 11   | 10.5 |      | 11.3 |      | 11.7 |      | 10.3 |      |      |
|                                 | NHP23      | 9.3  | 9.3  |      | 8.9  |      | 8.9  |      | 9.4  |      |      |
|                                 | NHP24      | 11.1 | 10.6 |      | 10.8 |      | 10.8 |      | 10.6 |      |      |

Abbreviations: BL, baseline.

Table S33 Monocyte Counts (10<sup>3</sup>/μL)

| Subject Group                   | Subject ID | BL-1 | BL-2 | 1    | 2    | 3    | 4    | 5    | 6    | 7    | 8    |
|---------------------------------|------------|------|------|------|------|------|------|------|------|------|------|
| Non-infected Control            | NHP C1     | 0.4  | 0.37 |      |      |      |      |      |      |      |      |
|                                 | NHP C2     | 0.23 | 0.24 |      |      |      |      |      |      |      |      |
|                                 | NHP C3     | 0.49 | 0.41 |      |      |      |      |      |      |      |      |
| Terminal: No Manipulations      | NHP1       | 0.24 | 0.34 |      |      |      |      |      | 0.02 |      |      |
|                                 | NHP2       | 0.33 | 0.37 |      |      |      |      |      |      | 0.01 |      |
|                                 | NHP3       | 0.4  | 0.2  |      |      |      |      |      |      |      | 0.05 |
|                                 | NHP4       | 0.21 | 0.25 |      |      |      |      |      |      | 0.19 |      |
|                                 | NHP5       | 0.33 | 0.24 |      |      |      |      | 0.11 |      |      |      |
|                                 | NHP6       | 0.51 | 0.34 |      |      |      |      |      |      |      | 0.11 |
| Terminal: Routine Manipulations | NHP7       | 0.44 | 0.69 |      |      | 1.36 |      | 0.15 |      | 0.04 |      |
|                                 | NHP8       | 0.19 | 0.45 |      |      | 0.78 |      | 0.04 | 0.11 |      |      |
|                                 | NHP9       | 0.24 | 0.67 |      |      | 0.73 |      | 0.03 |      |      | 0.22 |
|                                 | NHP10      | 0.18 | 0.26 |      |      | 0.35 |      | 0.08 |      | 0.03 |      |
|                                 | NHP11      | 0.34 | 0.43 |      |      | 0.97 |      | 0.06 | 0    |      |      |
|                                 | NHP12      | 0.24 | 0.33 |      |      | 0.6  |      | 0.13 |      |      | 1.33 |
| Necropsy Day 3                  | NHP13      | 0.23 | 0.3  | 0.41 |      | 1.02 |      |      |      |      |      |
|                                 | NHP14      | 0.19 | 0.15 | 0.2  |      | 0.63 |      |      |      |      |      |
|                                 | NHP15      | 0.25 | 0.29 | 0.45 |      | 0.77 |      |      |      |      |      |
| Necropsy Day 5                  | NHP16      | 0.3  | 0.5  | 0.32 |      | 0.76 |      | 0.02 |      |      |      |
|                                 | NHP17      | 0.19 | 0.42 | 0.45 |      | 0.59 |      | 2.08 |      |      |      |
|                                 | NHP18      | 0.34 | 0.45 | 0.4  |      |      |      | 0.01 |      |      |      |
| Necropsy Day 4                  | NHP19      | 0.82 | 0.59 |      | 0.63 |      | 0.64 |      |      |      |      |
|                                 | NHP20      | 0.63 | 0.52 |      | 0.44 |      | 1.13 |      |      |      |      |
|                                 | NHP21      | 0.27 | 0.34 |      | 0.47 |      | 1.13 |      |      |      |      |
| Necropsy Day 6                  | NHP22      | 0.31 | 0.52 |      | 0.28 |      | 0.53 |      | 0.01 |      |      |
|                                 | NHP23      | 0.35 | 0.5  |      | 0    |      | 0.32 |      | 0.72 |      |      |
|                                 | NHP24      | 0.19 | 0.27 |      | 0.14 |      | 0.18 |      | 0.05 |      |      |

Abbreviations: BL, baseline.

Table S34 Neutrophil Count (10<sup>3</sup> cells/μL)

| Subject Group                   | Subject ID | BL-1 | BL-2  | 1    | 2    | 3     | 4     | 5     | 6    | 7    | 8    |
|---------------------------------|------------|------|-------|------|------|-------|-------|-------|------|------|------|
| Non-infected Control            | NHP C1     | 3.12 | 2.95  |      |      |       |       |       |      |      |      |
|                                 | NHP C2     | 4.23 | 4.09  |      |      |       |       |       |      |      |      |
|                                 | NHP C3     | 3.64 | 3.29  |      |      |       |       |       |      |      |      |
| Terminal: No Manipulations      | NHP1       | 10.5 | 4.59  |      |      |       |       | 15.29 |      |      |      |
|                                 | NHP2       | 1.78 | 2.44  |      |      |       |       |       | 9.65 |      |      |
|                                 | NHP3       | 8.08 | 3.97  |      |      |       |       |       |      | 6.43 |      |
|                                 | NHP4       | 2.86 | 2.83  |      |      |       |       |       |      | 0.68 |      |
|                                 | NHP5       | 3.51 | 2.42  |      |      |       |       | 12.08 |      |      |      |
|                                 | NHP6       | 4.71 | 3.36  |      |      |       |       |       |      |      | 4.47 |
| Terminal: Routine Manipulations | NHP7       | 4.52 | 7.66  |      |      | 7.66  |       | 4.92  |      | 2.96 |      |
|                                 | NHP8       | 1.86 | 5.3   |      |      | 7.93  |       | 7.78  | 2.48 |      |      |
|                                 | NHP9       | 3.27 | 14.92 |      |      | 10.2  |       | 7.46  |      |      | 7.02 |
|                                 | NHP10      | 1.83 | 5.68  |      |      | 6.4   |       | 4.12  |      | 2.89 |      |
|                                 | NHP11      | 4.16 | 10.2  |      |      | 14.15 |       | 16.65 | 6.48 |      |      |
|                                 | NHP12      | 1.94 | 11.46 |      |      | 6.69  |       | 6.04  |      |      | 5.04 |
| Necropsy Day 3                  | NHP13      | 2.65 | 0     | 3.95 |      | 7.63  |       |       |      |      |      |
|                                 | NHP14      | 1.59 | 1.73  | 0.81 |      | 3.37  |       |       |      |      |      |
|                                 | NHP15      | 2.95 | 2.69  | 3.08 |      | 8.62  |       |       |      |      |      |
| Necropsy Day 5                  | NHP16      | 2.04 | 3.84  | 1.43 |      | 10.7  |       | 6.26  |      |      |      |
|                                 | NHP17      | 3.44 | 6.54  | 3.85 |      | 10.81 |       | 12.72 |      |      |      |
|                                 | NHP18      | 2.36 | 5.17  | 2.94 |      |       |       | 8.24  |      |      |      |
| Necropsy Day 4                  | NHP19      | 3.96 | 3.57  |      | 3.28 |       | 22.01 |       |      |      |      |
|                                 | NHP20      | 2.68 | 3.11  |      | 1.75 |       | 13.28 |       |      |      |      |
|                                 | NHP21      | 1.42 | 2     |      | 3.51 |       | 17.62 |       |      |      |      |
| Necropsy Day 6                  | NHP22      | 2.15 | 7.21  |      | 2.43 |       | 19.6  |       | 5.07 |      |      |
|                                 | NHP23      | 3.96 | 8.98  |      | 5.2  |       | 13.39 |       | 6.42 |      |      |
|                                 | NHP24      | 2.23 | 3.38  |      | 2.1  |       | 13.02 |       | 4.1  |      |      |

**Table S35 Percent Basophil (%)**

| Subject Group                   | Subject ID | BL-1 | BL-2 | 1   | 2   | 3   | 4   | 5   | 6   | 7   | 8   |
|---------------------------------|------------|------|------|-----|-----|-----|-----|-----|-----|-----|-----|
| Non-infected Control            | NHP C1     | 0.2  | 0.3  |     |     |     |     |     |     |     |     |
|                                 | NHP C2     | 0.3  | 0.1  |     |     |     |     |     |     |     |     |
|                                 | NHP C3     | 0.1  | 0    |     |     |     |     |     |     |     |     |
| Terminal: No Manipulations      | NHP1       | 0.1  | 0.1  |     |     |     |     |     | 0.1 |     |     |
|                                 | NHP2       | 0.2  | 0.2  |     |     |     |     |     |     | 0.1 |     |
|                                 | NHP3       | 0.2  | 0.1  |     |     |     |     |     |     |     | 0   |
|                                 | NHP4       | 0.2  | 0.2  |     |     |     |     |     |     | 3.4 |     |
|                                 | NHP5       | 0.3  | 0.2  |     |     |     |     | 0.2 |     |     |     |
|                                 | NHP6       | 0.1  | 0    |     |     |     |     |     |     |     | 0.6 |
| Terminal: Routine Manipulations | NHP7       | 0.3  | 0.1  |     |     | 0.1 |     | 0.1 |     | 0   |     |
|                                 | NHP8       | 0.2  | 0.2  |     |     | 0.2 |     | 0.1 | 0.2 |     |     |
|                                 | NHP9       | 0.2  | 0.1  |     |     | 0.2 |     | 0   |     |     | 0.8 |
|                                 | NHP10      | 0    | 0    |     |     | 0.1 |     | 0   |     | 0.5 |     |
|                                 | NHP11      | 0.1  | 0.1  |     |     | 0.1 |     | 0.1 | 0   |     |     |
|                                 | NHP12      | 0.3  | 0.1  |     |     | 0.2 |     | 0.1 |     |     | 4.3 |
| Necropsy Day 3                  | NHP13      | 0.2  | 0.2  | 0.5 |     | 0.1 |     |     |     |     |     |
|                                 | NHP14      | 0.3  | 0.2  | 0.3 |     | 0.2 |     |     |     |     |     |
|                                 | NHP15      | 0.6  | 0.6  | 0.7 |     | 0.2 |     |     |     |     |     |
| Necropsy Day 5                  | NHP16      | 0.4  | 0.7  | 1.3 |     | 0.2 |     | 0.4 |     |     |     |
|                                 | NHP17      | 0    | 0.1  | 0.4 |     | 0.1 |     | 0.1 |     |     |     |
|                                 | NHP18      | 0    | 0.1  | 0.4 |     |     |     | 0.2 |     |     |     |
| Necropsy Day 4                  | NHP19      | 0.3  | 0.1  |     | 0.5 |     | 0.2 |     |     |     |     |
|                                 | NHP20      | 0.3  | 0.2  |     | 0.2 |     | 0.1 |     |     |     |     |
|                                 | NHP21      | 0.2  | 0.9  |     | 0.5 |     | 0.1 |     |     |     |     |
| Necropsy Day 6                  | NHP22      | 0.3  | 0.2  |     | 0.6 |     | 0   |     | 0.2 |     |     |
|                                 | NHP23      | 0.3  | 0.1  |     | 0.1 |     | 0   |     | 0   |     |     |
|                                 | NHP24      | 0.2  | 0.2  |     | 0.4 |     | 0.1 |     | 0.2 |     |     |

Abbreviations: BL, baseline.

**Table S36 Percent Eosinophil (%)**

| Subject Group                   | Subject ID | BL-1 | BL-2 | 1   | 2   | 3   | 4 | 5   | 6   | 7   | 8   |
|---------------------------------|------------|------|------|-----|-----|-----|---|-----|-----|-----|-----|
| Non-infected Control            | NHP C1     | 0.9  | 0.6  |     |     |     |   |     |     |     |     |
|                                 | NHP C2     | 0    | 0    |     |     |     |   |     |     |     |     |
|                                 | NHP C3     | 0.9  | 0.7  |     |     |     |   |     |     |     |     |
| Terminal: No Manipulations      | NHP1       | 0    | 0.7  |     |     |     |   |     | 0   |     |     |
|                                 | NHP2       | 0    | 0.7  |     |     |     |   |     |     | 0   |     |
|                                 | NHP3       | 0.4  | 0.5  |     |     |     |   |     |     |     | 0.1 |
|                                 | NHP4       | 1.3  | 1.8  |     |     |     |   |     |     | 0.8 |     |
|                                 | NHP5       | 0.7  | 0.4  |     |     |     |   | 0.3 |     |     |     |
|                                 | NHP6       | 1.3  | 1.5  |     |     |     |   |     |     |     | 0.5 |
| Terminal: Routine Manipulations | NHP7       | 0.3  | 0    |     |     | 0.1 |   | 0.1 |     | 0.3 |     |
|                                 | NHP8       | 3.6  | 0.3  |     |     | 0.9 |   | 0.2 | 0.4 |     |     |
|                                 | NHP9       | 2.5  | 0    |     |     | 0.2 |   | 0.6 |     |     | 0.1 |
|                                 | NHP10      | 2.2  | 0.7  |     |     | 0.3 |   | 0.2 |     | 0   |     |
|                                 | NHP11      | 1.6  | 0.4  |     |     | 0.1 |   | 0.1 | 0.3 |     |     |
|                                 | NHP12      | 1.3  | 0    |     |     | 0.1 |   | 0   |     |     | 0.4 |
| Necropsy Day 3                  | NHP13      | 4.4  | 0    | 1.8 |     | 0.2 |   |     |     |     |     |
|                                 | NHP14      | 1.9  | 4.2  | 4.5 |     | 4.5 |   |     |     |     |     |
|                                 | NHP15      | 0.8  | 2.8  | 0.7 |     | 0   |   |     |     |     |     |
| Necropsy Day 5                  | NHP16      | 4.9  | 11   | 3.6 |     | 0.2 |   | 0.1 |     |     |     |
|                                 | NHP17      | 0.5  | 0    | 0   |     | 0   |   | 0   |     |     |     |
|                                 | NHP18      | 0.5  | 0.1  | 0.4 |     |     |   | 0.2 |     |     |     |
| Necropsy Day 4                  | NHP19      | 0.6  | 0.2  |     | 0.1 |     | 0 |     |     |     |     |
|                                 | NHP20      | 2.9  | 1.1  |     | 0.7 |     | 0 |     |     |     |     |
|                                 | NHP21      | 1.6  | 0.7  |     | 0.3 |     | 0 |     |     |     |     |
| Necropsy Day 6                  | NHP22      | 0.4  | 0.1  |     | 0.2 |     | 0 |     | 0.2 |     |     |
|                                 | NHP23      | 0.4  | 0.3  |     | 0.0 |     | 0 |     | 0.5 |     |     |
|                                 | NHP24      | 0.4  | 0.2  |     | 0   |     | 0 |     | 0   |     |     |

Abbreviations: BL, baseline.

**Table S37 Percent Lymphocyte (%)**

| Subject Group                   | Subject ID | BL-1 | BL-2 | 1    | 2    | 3    | 4   | 5    | 6    | 7    | 8    |
|---------------------------------|------------|------|------|------|------|------|-----|------|------|------|------|
| Non-infected Control            | NHP C1     | 44.4 | 46.5 |      |      |      |     |      |      |      |      |
|                                 | NHP C2     | 30.1 | 36.6 |      |      |      |     |      |      |      |      |
|                                 | NHP C3     | 40.2 | 45.8 |      |      |      |     |      |      |      |      |
| Terminal: No Manipulations      | NHP1       | 15.2 | 32   |      |      |      |     |      | 11.3 |      |      |
|                                 | NHP2       | 57   | 51   |      |      |      |     |      |      | 20   |      |
|                                 | NHP3       | 33.3 | 45.4 |      |      |      |     |      |      |      | 18.4 |
|                                 | NHP4       | 42.2 | 41.3 |      |      |      |     |      |      | 62.7 |      |
|                                 | NHP5       | 33.7 | 42.5 |      |      |      |     | 30.9 |      |      |      |
|                                 | NHP6       | 29.7 | 44   |      |      |      |     |      |      |      | 25.6 |
| Terminal: Routine Manipulations | NHP7       | 19   | 19.5 |      |      | 13.4 |     | 27.9 |      | 48.1 |      |
|                                 | NHP8       | 61   | 39.3 |      |      | 26.3 |     | 17.1 | 45.4 |      |      |
|                                 | NHP9       | 37.8 | 15.1 |      |      | 16.4 |     | 16.5 |      |      | 16.3 |
|                                 | NHP10      | 49.4 | 27.4 |      |      | 21.2 |     | 21.2 |      | 32.3 |      |
|                                 | NHP11      | 43.9 | 24.2 |      |      | 13   |     | 8.3  | 14.2 |      |      |
|                                 | NHP12      | 43.4 | 10.1 |      |      | 16.2 |     | 10.6 |      |      | 36.4 |
| Necropsy Day 3                  | NHP13      | 44.5 | 55.1 | 31.1 |      | 12.1 |     |      |      |      |      |
|                                 | NHP14      | 49.5 | 53.6 | 64.7 |      | 23.4 |     |      |      |      |      |
|                                 | NHP15      | 38.3 | 41.2 | 39.7 |      | 12.5 |     |      |      |      |      |
| Necropsy Day 5                  | NHP16      | 44.4 | 31.4 | 58.3 |      | 12.3 |     | 13.2 |      |      |      |
|                                 | NHP17      | 17.2 | 13.6 | 22.9 |      | 8.2  |     | 10.6 |      |      |      |
|                                 | NHP18      | 38.7 | 27.8 | 33.6 |      |      |     | 11.1 |      |      |      |
| Necropsy Day 4                  | NHP19      | 55.4 | 52.7 |      | 57   |      | 5.8 |      |      |      |      |
|                                 | NHP20      | 46.9 | 35   |      | 48.3 |      | 9.2 |      |      |      |      |
|                                 | NHP21      | 58.5 | 43   |      | 37.4 |      | 6.1 |      |      |      |      |
| Necropsy Day 6                  | NHP22      | 66.2 | 29   |      | 49.4 |      | 7.4 |      | 19.4 |      |      |
|                                 | NHP23      | 35.5 | 18.2 |      | 27.4 |      | 7.9 |      | 13.8 |      |      |
|                                 | NHP24      | 52.1 | 34.5 |      | 54.3 |      | 7.5 |      | 30.3 |      |      |

Abbreviations: BL, baseline.

Table S38 Percent Monocyte (%)

| Subject Group                   | Subject ID | BL-1 | BL-2 | 1   | 2    | 3    | 4   | 5    | 6   | 7   | 8    |
|---------------------------------|------------|------|------|-----|------|------|-----|------|-----|-----|------|
| Non-infected Control            | NHP C1     | 6.2  | 5.9  |     |      |      |     |      |     |     |      |
|                                 | NHP C2     | 3.6  | 3.5  |     |      |      |     |      |     |     |      |
|                                 | NHP C3     | 7    | 5.9  |     |      |      |     |      |     |     |      |
| Terminal: No Manipulations      | NHP1       | 1.9  | 4.6  |     |      |      |     |      | 0.1 |     |      |
|                                 | NHP2       | 6.7  | 6.3  |     |      |      |     |      |     | 0.1 |      |
|                                 | NHP3       | 3.1  | 2.6  |     |      |      |     |      |     |     | 0.6  |
|                                 | NHP4       | 3.9  | 4.6  |     |      |      |     |      |     | 7.2 |      |
|                                 | NHP5       | 5.6  | 5.1  |     |      |      |     | 0.6  |     |     |      |
|                                 | NHP6       | 6.7  | 5    |     |      |      |     |      |     |     | 1.8  |
| Terminal: Routine Manipulations | NHP7       | 7.1  | 6.6  |     |      | 13   |     | 2.1  |     | 0.7 |      |
|                                 | NHP8       | 3.3  | 4.7  |     |      | 6.5  |     | 0.4  | 2.3 |     |      |
|                                 | NHP9       | 4.1  | 3.6  |     |      | 5.6  |     | 0.3  |     |     | 2.5  |
|                                 | NHP10      | 4.3  | 3.1  |     |      | 4.1  |     | 1.5  |     | 0.7 |      |
|                                 | NHP11      | 4.1  | 3    |     |      | 5.6  |     | 0.3  | 0.4 |     |      |
|                                 | NHP12      | 6.1  | 2.5  |     |      | 6.9  |     | 1.9  |     |     | 12.3 |
| Necropsy Day 3                  | NHP13      | 4.1  | 5.5  | 6.3 |      | 10.3 |     |      |     |     |      |
|                                 | NHP14      | 5.2  | 3.3  | 6   |      | 11.3 |     |      |     |     |      |
|                                 | NHP15      | 4.7  | 5.4  | 7.5 |      | 7.2  |     |      |     |     |      |
| Necropsy Day 5                  | NHP16      | 6.4  | 6.6  | 6.7 |      | 5.8  |     | 0.3  |     |     |      |
|                                 | NHP17      | 4.3  | 5.2  | 8   |      | 4.7  |     | 12.5 |     |     |      |
|                                 | NHP18      | 7.7  | 5.8  | 7.9 |      |      |     | 0.1  |     |     |      |
| Necropsy Day 4                  | NHP19      | 7.5  | 6.7  |     | 6.8  |      | 2.7 |      |     |     |      |
|                                 | NHP20      | 9.5  | 9.1  |     | 10.2 |      | 7.1 |      |     |     |      |
|                                 | NHP21      | 6.3  | 8    |     | 7.3  |      | 5.6 |      |     |     |      |
| Necropsy Day 6                  | NHP22      | 4.2  | 4.8  |     | 5.1  |      | 2.4 |      | 0.2 |     |      |
|                                 | NHP23      | 5.2  | 4.3  |     | 6.5  |      | 2.2 |      | 8.6 |     |      |
|                                 | NHP24      | 3.7  | 4.8  |     | 2.8  |      | 1.3 |      | 0.8 |     |      |

Abbreviations: BL, baseline.

**Table S39 Percent Neutrophil (%)**

| Subject Group                   | Subject ID | BL-1 | BL-2  | 1    | 2    | 3     | 4     | 5     | 6    | 7    | 8    |
|---------------------------------|------------|------|-------|------|------|-------|-------|-------|------|------|------|
| Non-infected Control            | NHP C1     | 3.12 | 2.95  |      |      |       |       |       |      |      |      |
|                                 | NHP C2     | 4.23 | 4.09  |      |      |       |       |       |      |      |      |
|                                 | NHP C3     | 3.64 | 3.29  |      |      |       |       |       |      |      |      |
| Terminal: No Manipulations      | NHP1       | 10.5 | 4.59  |      |      |       |       | 15.29 |      |      |      |
|                                 | NHP2       | 1.78 | 2.44  |      |      |       |       |       | 9.65 |      |      |
|                                 | NHP3       | 8.08 | 3.97  |      |      |       |       |       |      | 6.43 |      |
|                                 | NHP4       | 2.86 | 2.83  |      |      |       |       |       |      | 0.68 |      |
|                                 | NHP5       | 3.51 | 2.42  |      |      |       |       | 12.08 |      |      |      |
|                                 | NHP6       | 4.71 | 3.36  |      |      |       |       |       |      |      | 4.47 |
| Terminal: Routine Manipulations | NHP7       | 4.52 | 7.66  |      |      | 7.66  |       | 4.92  |      | 2.96 |      |
|                                 | NHP8       | 1.86 | 5.3   |      |      | 7.93  |       | 7.78  | 2.48 |      |      |
|                                 | NHP9       | 3.27 | 14.92 |      |      | 10.2  |       | 7.46  |      |      | 7.02 |
|                                 | NHP10      | 1.83 | 5.68  |      |      | 6.4   |       | 4.12  |      | 2.89 |      |
|                                 | NHP11      | 4.16 | 10.2  |      |      | 14.15 |       | 16.65 | 6.48 |      |      |
|                                 | NHP12      | 1.94 | 11.46 |      |      | 6.69  |       | 6.04  |      |      | 5.04 |
| Necropsy Day 3                  | NHP13      | 2.65 | 0     | 3.95 |      | 7.63  |       |       |      |      |      |
|                                 | NHP14      | 1.59 | 1.73  | 0.81 |      | 3.37  |       |       |      |      |      |
|                                 | NHP15      | 2.95 | 2.69  | 3.08 |      | 8.62  |       |       |      |      |      |
| Necropsy Day 5                  | NHP16      | 2.04 | 3.84  | 1.43 |      | 10.7  |       | 6.26  |      |      |      |
|                                 | NHP17      | 3.44 | 6.54  | 3.85 |      | 10.81 |       | 12.72 |      |      |      |
|                                 | NHP18      | 2.36 | 5.17  | 2.94 |      |       |       | 8.24  |      |      |      |
| Necropsy Day 4                  | NHP19      | 3.96 | 3.57  |      | 3.28 |       | 22.01 |       |      |      |      |
|                                 | NHP20      | 2.68 | 3.11  |      | 1.75 |       | 13.28 |       |      |      |      |
|                                 | NHP21      | 1.42 | 2     |      | 3.51 |       | 17.62 |       |      |      |      |
| Necropsy Day 6                  | NHP22      | 2.15 | 7.21  |      | 2.43 |       | 19.6  |       | 5.07 |      |      |
|                                 | NHP23      | 3.12 | 2.95  |      |      |       |       |       |      |      |      |
|                                 | NHP24      | 4.23 | 4.09  |      |      |       |       |       |      |      |      |

Abbreviations: BL, baseline.



**Table S40 Percent Reticulocyte (%)**

| Subject Group                   | Subject ID | BL-1 | BL-2 | 1    | 2    | 3    | 4    | 5    | 6    | 7    | 8    |
|---------------------------------|------------|------|------|------|------|------|------|------|------|------|------|
| Non-infected Control            | NHP C1     | 1.34 | 1.65 |      |      |      |      |      |      |      |      |
|                                 | NHP C2     | 1.15 | 1.79 |      |      |      |      |      |      |      |      |
|                                 | NHP C3     | 0.47 | 0.76 |      |      |      |      |      |      |      |      |
| Terminal: No Manipulations      | NHP1       | 0.94 | 0.79 |      |      |      |      |      | 0.26 |      |      |
|                                 | NHP2       | 0.81 | 1.09 |      |      |      |      |      |      | 0.1  |      |
|                                 | NHP3       | 0.81 | 0.84 |      |      |      |      |      |      |      | 0.13 |
|                                 | NHP4       | 0.84 | 1.01 |      |      |      |      |      |      | 0.14 |      |
|                                 | NHP5       | 1.33 | 0.88 |      |      |      |      | 0.15 |      |      |      |
|                                 | NHP6       | 1.12 | 0.7  |      |      |      |      |      |      |      | 0.07 |
| Terminal: Routine Manipulations | NHP7       | 0.32 | 1.16 |      |      | 0.79 |      | 0.51 |      | 0.13 |      |
|                                 | NHP8       | 1.32 | 1.29 |      |      | 0.68 |      | 0.57 | 0.13 |      |      |
|                                 | NHP9       | 0.9  | 1.17 |      |      | 0.62 |      | 0.25 |      |      | 0    |
|                                 | NHP10      | 1.04 | 0.36 |      |      | 1.23 |      | 0.64 |      | 0.1  |      |
|                                 | NHP11      | 0.68 | 0.69 |      |      | 0.95 |      | 0.68 | 0.17 |      |      |
|                                 | NHP12      | 1.21 | 0.92 |      |      | 0.97 |      | 0.37 |      |      | 0.11 |
| Necropsy Day 3                  | NHP13      | 0.89 | 0.7  | 0.69 |      | 0.69 |      |      |      |      |      |
|                                 | NHP14      | 1.18 | 1.3  | 1.64 |      | 1.16 |      |      |      |      |      |
|                                 | NHP15      | 1.19 | 1.73 | 1.23 |      | 1.16 |      |      |      |      |      |
| Necropsy Day 5                  | NHP16      | 1.21 | 0.72 | 0.66 |      | 0.78 |      | 0.42 |      |      |      |
|                                 | NHP17      | 0.9  | 0.97 | 1.11 |      | 0.64 |      | 0.68 |      |      |      |
|                                 | NHP18      | 1.94 | 1.81 | 2.41 |      |      |      | 0.81 |      |      |      |
| Necropsy Day 4                  | NHP19      | 0.65 | 0.61 |      | 0.54 |      | 0.37 |      |      |      |      |
|                                 | NHP20      | 1.45 | 1.38 |      | 1.41 |      | 1.02 |      |      |      |      |
|                                 | NHP21      | 1.26 | 1.07 |      | 0.94 |      | 0.73 |      |      |      |      |
| Necropsy Day 6                  | NHP22      | 0.7  | 0.56 |      | 0.51 |      | 0.31 |      | 0.11 |      |      |
|                                 | NHP23      | 0.98 | 1.35 |      | 1.2  |      | 0.58 |      | 0.18 |      |      |
|                                 | NHP24      | 0.57 | 1.26 |      | 0.98 |      | 0.39 |      | 0.17 |      |      |

Abbreviations: BL, baseline.

Table S41 Platelet Counts (10<sup>3</sup> cells/ $\mu$ L)

| Subject Group                   | Subject ID | BL-1 | BL-2 | 1   | 2   | 3   | 4   | 5   | 6   | 7   | 8  |
|---------------------------------|------------|------|------|-----|-----|-----|-----|-----|-----|-----|----|
| Non-infected Control            | NHP C1     | 319  | 332  |     |     |     |     |     |     |     |    |
|                                 | NHP C2     | 267  | 316  |     |     |     |     |     |     |     |    |
|                                 | NHP C3     | 271  | 308  |     |     |     |     |     |     |     |    |
| Terminal: No Manipulations      | NHP1       | 393  | 278  |     |     |     |     |     | 165 |     |    |
|                                 | NHP2       | 125  | 159  |     |     |     |     |     |     | 29  |    |
|                                 | NHP3       | 387  | 335  |     |     |     |     |     |     |     | 61 |
|                                 | NHP4       | 240  | 236  |     |     |     |     |     |     | 33  |    |
|                                 | NHP5       | 337  | 306  |     |     |     |     | 100 |     |     |    |
|                                 | NHP6       | 274  | 362  |     |     |     |     |     |     |     | 51 |
| Terminal: Routine Manipulations | NHP7       | 257  | 352  |     |     | 263 |     | 141 |     | 102 |    |
|                                 | NHP8       | 328  | 343  |     |     | 293 |     | 118 | 69  |     |    |
|                                 | NHP9       | 265  | 302  |     |     | 240 |     | 119 |     |     | 49 |
|                                 | NHP10      | 216  | 201  |     |     | 195 |     | 93  |     | 29  |    |
|                                 | NHP11      | 347  | 409  |     |     | 325 |     | 164 | 67  |     |    |
|                                 | NHP12      | 330  | 307  |     |     | 293 |     | 149 |     |     | 50 |
| Necropsy Day 3                  | NHP13      | 316  | 345  | 257 |     | 244 |     |     |     |     |    |
|                                 | NHP14      | 360  | 413  | 343 |     | 233 |     |     |     |     |    |
|                                 | NHP15      | 256  | 295  | 216 |     | 192 |     |     |     |     |    |
| Necropsy Day 5                  | NHP16      | 339  | 293  | 315 |     | 277 |     | 154 |     |     |    |
|                                 | NHP17      | 254  | 258  | 257 |     | 232 |     | 169 |     |     |    |
|                                 | NHP18      | 308  | 337  | 333 |     |     |     | 87  |     |     |    |
| Necropsy Day 4                  | NHP19      | 312  | 332  |     | 267 |     | 135 |     |     |     |    |
|                                 | NHP20      | 399  | 442  |     | 412 |     | 329 |     |     |     |    |
|                                 | NHP21      | 325  | 319  |     | 341 |     | 221 |     |     |     |    |
| Necropsy Day 6                  | NHP22      | 277  | 271  |     | 225 |     | 189 |     | 65  |     |    |
|                                 | NHP23      | 365  | 356  |     | 354 |     | 253 |     | 155 |     |    |
|                                 | NHP24      | 284  | 298  |     | 288 |     | 236 |     | 110 |     |    |

Abbreviations: BL, baseline.

**Table S42 Platelet Distribution Width (femto)**

| Subject Group                   | Subject ID | BL-1 | BL-2 | 1    | 2    | 3    | 4    | 5    | 6    | 7    | 8    |
|---------------------------------|------------|------|------|------|------|------|------|------|------|------|------|
| Non-infected Control            | NHP C1     | 12.3 | 11.1 |      |      |      |      |      |      |      |      |
|                                 | NHP C2     | 12.4 | 11.3 |      |      |      |      |      |      |      |      |
|                                 | NHP C3     | 10   | 9.4  |      |      |      |      |      |      |      |      |
| Terminal: No Manipulations      | NHP1       | 12.5 | 13.6 |      |      |      |      |      | 14.3 |      |      |
|                                 | NHP2       | 12.5 | 13.2 |      |      |      |      |      |      |      |      |
|                                 | NHP3       | 12.4 | 12.4 |      |      |      |      |      |      |      | 14.2 |
|                                 | NHP4       | 14.1 | 13.9 |      |      |      |      |      |      |      |      |
|                                 | NHP5       | 12.9 | 12   |      |      |      |      |      |      |      |      |
|                                 | NHP6       | 11.9 | 8.6  |      |      |      |      |      |      |      |      |
| Terminal: Routine Manipulations | NHP7       | 10.6 | 11.1 |      |      | 11.8 |      | 12.8 |      | 10.9 |      |
|                                 | NHP8       | 11.1 | 11   |      |      | 11   |      | 13.3 | 15.1 |      |      |
|                                 | NHP9       | 12.4 | 11.8 |      |      | 12.4 |      | 13.3 |      |      | 16.6 |
|                                 | NHP10      | 11.4 | 11.1 |      |      | 12.8 |      | 12.9 |      | 14.3 |      |
|                                 | NHP11      | 11.7 | 11.1 |      |      | 11.5 |      | 12.4 | 12.2 |      |      |
|                                 | NHP12      | 11.6 | 10.9 |      |      | 11.4 |      | 11.6 |      |      |      |
| Necropsy Day 3                  | NHP13      | 11   | 10.9 | 10.7 |      | 10.5 |      |      |      |      |      |
|                                 | NHP14      | 12.2 | 11.4 | 11.9 |      | 13.6 |      |      |      |      |      |
|                                 | NHP15      | 13.9 | 12.1 | 13.4 |      | 14.2 |      |      |      |      |      |
| Necropsy Day 5                  | NHP16      | 10.3 | 9.1  | 10.2 |      | 10.4 |      | 10.7 |      |      |      |
|                                 | NHP17      | 10.6 | 10.1 | 10.2 |      | 9.9  |      | 10.5 |      |      |      |
|                                 | NHP18      | 12.4 | 11.8 | 11.6 |      |      |      | 12.4 |      |      |      |
| Necropsy Day 4                  | NHP19      | 12.2 | 11.4 |      | 11.9 |      | 13.6 |      |      |      |      |
|                                 | NHP20      | 10.2 | 8.6  |      | 9.1  |      | 10.2 |      |      |      |      |
|                                 | NHP21      | 9.8  | 9.6  |      | 9.8  |      | 10.6 |      |      |      |      |
| Necropsy Day 6                  | NHP22      | 12.4 | 11.7 |      | 13.2 |      | 13.5 |      | 15.1 |      |      |
|                                 | NHP23      | 9.7  | 9.1  |      | 8.8  |      | 9.3  |      | 10.5 |      |      |
|                                 | NHP24      | 11.8 | 11.2 |      | 11.9 |      | 11.8 |      | 12.2 |      |      |

Abbreviations: BL, baseline.

**Table S43 Platelet – Large Cell Ratio (%)**

| Subject Group                   | Subject ID | BL-1 | BL-2 | 1    | 2    | 3    | 4    | 5    | 6    | 7    | 8    |
|---------------------------------|------------|------|------|------|------|------|------|------|------|------|------|
| Non-infected Control            | NHP C1     | 34.9 | 28.3 |      |      |      |      |      |      |      |      |
|                                 | NHP C2     | 38.6 | 36.1 |      |      |      |      |      |      |      |      |
|                                 | NHP C3     | 21.4 | 18.9 |      |      |      |      |      |      |      |      |
| Terminal: No Manipulations      | NHP1       | 38.1 | 37.9 |      |      |      |      |      | 30.9 |      |      |
|                                 | NHP2       | 35.6 | 33.3 |      |      |      |      |      |      |      |      |
|                                 | NHP3       | 36.9 | 35.3 |      |      |      |      |      |      |      | 30   |
|                                 | NHP4       | 42.2 | 37.6 |      |      |      |      |      |      |      |      |
|                                 | NHP5       | 34.9 | 30.6 |      |      |      |      |      |      |      |      |
|                                 | NHP6       | 29.1 | 13.3 |      |      |      |      |      |      |      | 23.2 |
| Terminal: Routine Manipulations | NHP7       | 27   | 31.4 |      |      | 33.3 |      | 32.5 |      | 21.3 |      |
|                                 | NHP8       | 29.3 | 23.2 |      |      | 26.8 |      | 28.9 | 29.7 |      |      |
|                                 | NHP9       | 37.3 | 33   |      |      | 36.2 |      | 37.8 |      |      | 28.3 |
|                                 | NHP10      | 33.3 | 28.4 |      |      | 34.1 |      | 31.9 |      | 30.4 |      |
|                                 | NHP11      | 33.6 | 27.4 |      |      | 29.8 |      | 34.2 | 26.7 |      |      |
|                                 | NHP12      | 32.9 | 26.3 |      |      | 30.2 |      | 31.5 |      |      |      |
| Necropsy Day 3                  | NHP13      | 31   | 28.3 | 27.6 |      | 27.8 |      |      |      |      |      |
|                                 | NHP14      | 38.7 | 34.1 | 35.7 |      | 42.5 |      |      |      |      |      |
|                                 | NHP15      | 42.9 | 36.2 | 38.2 |      | 41.3 |      |      |      |      |      |
| Necropsy Day 5                  | NHP16      | 24.7 | 17.8 | 22.8 |      | 23.5 |      | 26.2 |      |      |      |
|                                 | NHP17      | 26.6 | 22.8 | 24.5 |      | 23.9 |      | 24.1 |      |      |      |
|                                 | NHP18      | 36.7 | 34.5 | 35.8 |      |      |      | 32.2 |      |      |      |
| Necropsy Day 4                  | NHP19      | 36.9 | 32.3 |      | 34.2 |      | 38.5 |      |      |      |      |
|                                 | NHP20      | 21.9 | 13.3 |      | 17.6 |      | 23   |      |      |      |      |
|                                 | NHP21      | 24   | 20.3 |      | 22.6 |      | 28.2 |      |      |      |      |
| Necropsy Day 6                  | NHP22      | 34   | 30   |      | 35.4 |      | 38.8 |      | 30.9 |      |      |
|                                 | NHP23      | 19.3 | 18.4 |      | 15.5 |      | 16.4 |      | 21.3 |      |      |
|                                 | NHP24      | 35.1 | 30.8 |      | 32.3 |      | 32.3 |      | 29.4 |      |      |

Abbreviations: BL, baseline.

**Table S44 Plateletcrit (%)**

| Subject Group                   | Subject ID | BL-1 | BL-2 | 1    | 2    | 3    | 4    | 5    | 6    | 7    | 8    |
|---------------------------------|------------|------|------|------|------|------|------|------|------|------|------|
| Non-infected Control            | NHP C1     | 0.35 | 0.34 |      |      |      |      |      |      |      |      |
|                                 | NHP C2     | 0.31 | 0.36 |      |      |      |      |      |      |      |      |
|                                 | NHP C3     | 0.26 | 0.29 |      |      |      |      |      |      |      |      |
| Terminal: No Manipulations      | NHP1       | 0.46 | 0.33 |      |      |      |      |      | 0.17 |      |      |
|                                 | NHP2       | 0.14 | 0.18 |      |      |      |      |      |      |      |      |
|                                 | NHP3       | 0.44 | 0.37 |      |      |      |      |      |      |      | 0.06 |
|                                 | NHP4       | 0.29 | 0.27 |      |      |      |      |      |      |      |      |
|                                 | NHP5       | 0.38 | 0.33 |      |      |      |      |      |      |      |      |
|                                 | NHP6       | 0.3  | 0.31 |      |      |      |      |      |      |      | 0.05 |
| Terminal: Routine Manipulations | NHP7       | 0.26 | 0.38 |      |      | 0.29 |      | 0.15 |      | 0.1  |      |
|                                 | NHP8       | 0.34 | 0.33 |      |      | 0.3  |      | 0.12 | 0.07 |      |      |
|                                 | NHP9       | 0.3  | 0.33 |      |      | 0.27 |      | 0.14 |      |      | 0.05 |
|                                 | NHP10      | 0.23 | 0.21 |      |      | 0.21 |      | 0.1  |      | 0.03 |      |
|                                 | NHP11      | 0.38 | 0.42 |      |      | 0.34 |      | 0.18 | 0.07 |      |      |
|                                 | NHP12      | 0.36 | 0.31 |      |      | 0.31 |      | 0.16 |      |      |      |
| Necropsy Day 3                  | NHP13      | 0.34 | 0.36 | 0.26 |      | 0.25 |      |      |      |      |      |
|                                 | NHP14      | 0.41 | 0.46 | 0.38 |      | 0.29 |      |      |      |      |      |
|                                 | NHP15      | 0.31 | 0.33 | 0.25 |      | 0.23 |      |      |      |      |      |
| Necropsy Day 5                  | NHP16      | 0.34 | 0.27 | 0.31 |      | 0.27 |      | 0.15 |      |      |      |
|                                 | NHP17      | 0.26 | 0.25 | 0.25 |      | 0.23 |      | 0.17 |      |      |      |
|                                 | NHP18      | 0.35 | 0.38 | 0.37 |      |      |      | 0.09 |      |      |      |
| Necropsy Day 4                  | NHP19      | 0.36 | 0.36 |      | 0.29 |      | 0.16 |      |      |      |      |
|                                 | NHP20      | 0.38 | 0.38 |      | 0.38 |      | 0.32 |      |      |      |      |
|                                 | NHP21      | 0.32 | 0.3  |      | 0.33 |      | 0.23 |      |      |      |      |
| Necropsy Day 6                  | NHP22      | 0.31 | 0.28 |      | 0.25 |      | 0.22 |      | 0.07 |      |      |
|                                 | NHP23      | 0.34 | 0.33 |      | 0.3  |      | 0.23 |      | 0.15 |      |      |
|                                 | NHP24      | 0.32 | 0.32 |      | 0.31 |      | 0.26 |      | 0.12 |      |      |

Abbreviations: BL, baseline.

**Table S45 Reticulocyte Counts (10<sup>6</sup> cells/ $\mu$ L)**

| Subject Group                   | Subject ID | BL-1   | BL-2   | 1      | 2      | 3      | 4      | 5      | 6      | 7      | 8      |
|---------------------------------|------------|--------|--------|--------|--------|--------|--------|--------|--------|--------|--------|
| Non-infected Control            | NHP C1     | 0.0682 | 0.0766 |        |        |        |        |        |        |        |        |
|                                 | NHP C2     | 0.0542 | 0.0763 |        |        |        |        |        |        |        |        |
|                                 | NHP C3     | 0.0234 | 0.035  |        |        |        |        |        |        |        |        |
| Terminal: No Manipulations      | NHP1       | 0.054  | 0.044  |        |        |        |        |        | 0.0131 |        |        |
|                                 | NHP2       | 0.0466 | 0.0604 |        |        |        |        |        |        | 0.0053 |        |
|                                 | NHP3       | 0.0407 | 0.0407 |        |        |        |        |        |        |        | 0.0062 |
|                                 | NHP4       | 0.0429 | 0.0488 |        |        |        |        |        |        | 0.0072 |        |
|                                 | NHP5       | 0.0745 | 0.0485 |        |        |        |        | 0.0066 |        |        |        |
|                                 | NHP6       | 0.062  | 0.0356 |        |        |        |        |        |        |        | 0.0033 |
| Terminal: Routine Manipulations | NHP7       | 0.013  | 0.0392 |        |        | 0.0354 |        | 0.0191 |        | 0.0042 |        |
|                                 | NHP8       | 0.0616 | 0.0596 |        |        | 0.0339 |        | 0.0256 | 0.0062 |        |        |
|                                 | NHP9       | 0.0436 | 0.0512 |        |        | 0.0299 |        | 0.0106 |        |        |        |
|                                 | NHP10      | 0.0431 | 0.0138 |        |        | 0.0493 |        | 0.0241 |        | 0.0041 |        |
|                                 | NHP11      | 0.0369 | 0.036  |        |        | 0.0501 |        | 0.0296 | 0.0095 |        |        |
|                                 | NHP12      | 0.0622 | 0.0416 |        |        | 0.0476 |        | 0.0157 |        |        | 0.0053 |
| Necropsy Day 3                  | NHP13      | 0.0423 | 0.0331 | 0.0312 |        | 0.0303 |        |        |        |        |        |
|                                 | NHP14      | 0.0509 | 0.0555 | 0.0713 |        | 0.0531 |        |        |        |        |        |
|                                 | NHP15      | 0.053  | 0.0702 | 0.0555 |        | 0.0469 |        |        |        |        |        |
| Necropsy Day 5                  | NHP16      | 0.0577 | 0.0331 | 0.0331 |        | 0.0356 |        | 0.0177 |        |        |        |
|                                 | NHP17      | 0.0412 | 0.0433 | 0.0514 |        | 0.0281 |        | 0.029  |        |        |        |
|                                 | NHP18      | 0.1003 | 0.0936 | 0.1205 |        |        |        | 0.035  |        |        |        |
| Necropsy Day 4                  | NHP19      | 0.0311 | 0.0251 |        | 0.023  |        | 0.0156 |        |        |        |        |
|                                 | NHP20      | 0.0796 | 0.0698 |        | 0.0736 |        | 0.0531 |        |        |        |        |
|                                 | NHP21      | 0.0634 | 0.0507 |        | 0.0466 |        | 0.0361 |        |        |        |        |
| Necropsy Day 6                  | NHP22      | 0.0301 | 0.0214 |        | 0.023  |        | 0.0119 |        | 0.0044 |        |        |
|                                 | NHP23      | 0.0569 | 0.0711 |        | 0.1    |        | 0.0317 |        | 0.0094 |        |        |
|                                 | NHP24      | 0.0249 | 0.0493 |        | 0.0412 |        | 0.0171 |        | 0.0067 |        |        |

Abbreviations: BL, baseline.

Table S46 White Blood Cell Counts (10<sup>3</sup> cells/ $\mu$ L)

| Subject Group                   | Subject ID | BL-1  | BL-2  | 1    | 2    | 3     | 4     | 5     | 6     | 7     | 8     |
|---------------------------------|------------|-------|-------|------|------|-------|-------|-------|-------|-------|-------|
| Non-infected Control            | NHP C1     | 6.46  | 6.32  |      |      |       |       |       |       |       |       |
|                                 | NHP C2     | 6.41  | 6.85  |      |      |       |       |       |       |       |       |
|                                 | NHP C3     | 7.02  | 6.92  |      |      |       |       |       |       |       |       |
| Terminal: No Manipulations      | NHP1       | 12.68 | 7.34  |      |      |       |       |       | 17.29 |       |       |
|                                 | NHP2       | 4.93  | 5.84  |      |      |       |       |       |       | 12.08 |       |
|                                 | NHP3       | 12.82 | 7.73  |      |      |       |       |       |       |       | 7.95  |
|                                 | NHP4       | 5.45  | 5.43  |      |      |       |       |       |       | 2.63  |       |
|                                 | NHP5       | 5.88  | 4.68  |      |      |       |       | 17.76 |       |       |       |
|                                 | NHP6       | 7.58  | 6.79  |      |      |       |       |       |       |       | 6.25  |
| Terminal: Routine Manipulations | NHP7       | 6.17  | 10.38 |      |      | 10.44 |       | 7.06  |       | 5.82  |       |
|                                 | NHP8       | 5.82  | 9.55  |      |      | 11.99 |       | 9.47  | 4.8   |       |       |
|                                 | NHP9       | 5.9   | 18.37 |      |      | 13.12 |       | 9.03  |       |       |       |
|                                 | NHP10      | 4.15  | 8.27  |      |      | 8.62  |       | 5.34  |       | 4.34  |       |
|                                 | NHP11      | 8.27  | 14.1  |      |      | 17.4  |       | 18.24 | 7.61  |       |       |
|                                 | NHP12      | 3.96  | 13.12 |      |      | 8.74  |       | 6.91  |       |       | 10.81 |
| Necropsy Day 3                  | NHP13      | 5.66  | 5.41  | 6.55 |      | 9.88  |       |       |       |       |       |
|                                 | NHP14      | 3.68  | 4.48  | 3.31 |      | 5.56  |       |       |       |       |       |
|                                 | NHP15      | 5.3   | 5.37  | 5.99 |      | 10.76 |       |       |       |       |       |
| Necropsy Day 5                  | NHP16      | 4.66  | 7.62  | 4.75 |      | 13.12 |       | 7.28  |       |       |       |
|                                 | NHP17      | 4.41  | 8.07  | 5.6  |      | 12.43 |       | 16.58 |       |       |       |
|                                 | NHP18      | 4.44  | 7.81  | 5.09 |      |       |       | 9.33  |       |       |       |
| Necropsy Day 4                  | NHP19      | 10.93 | 8.86  |      | 9.24 |       | 24.09 |       |       |       |       |
|                                 | NHP20      | 6.63  | 5.69  |      | 4.31 |       | 15.88 |       |       |       |       |
|                                 | NHP21      | 4.27  | 4.23  |      | 6.44 |       | 20.01 |       |       |       |       |
| Necropsy Day 6                  | NHP22      | 7.42  | 10.93 |      | 5.44 |       | 21.74 |       | 6.33  |       |       |
|                                 | NHP23      | 6.76  | 11.64 |      | 8    |       | 14.88 |       | 8.33  |       |       |
|                                 | NHP24      | 5.11  | 5.6   |      | 4.95 |       | 14.28 |       | 5.97  |       |       |

Abbreviations: BL, baseline.

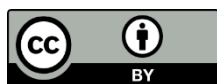

© 2020 by the authors. Submitted for possible open access publication under the terms and conditions of the Creative Commons Attribution (CC BY) license (<http://creativecommons.org/licenses/by/4.0/>).
